# Supplementary material for: Coronary atherosclerotic burden assessed by SYNTAX scores and outcomes in surgical, percutaneous or medical strategies: a retrospective cohort study
Source: PubMed Central journal article supplement — BMJ Open. 2022 Sep 22;12(9):e062378. doi: 10.1136/bmjopen-2022-062378 (PMC9511539; doi:10.1136/bmjopen-2022-062378), 2022-09-22
Supplement: bmjopen-2022-062378.draft_revisions.pdf [file bmjopen-2022-062378.draft_revisions.pdf]

# BMJ Open

BMJ Open is committed to open peer review. As part of this commitment we make the peer review history of every article we publish publicly available.

When an article is published we post the peer reviewers' comments and the authors' responses online. We also post the versions of the paper that were used during peer review. These are the versions that the peer review comments apply to.

The versions of the paper that follow are the versions that were submitted during the peer review process. They are not the versions of record or the final published versions. They should not be cited or distributed as the published version of this manuscript.

BMJ Open is an open access journal and the full, final, typeset and author-corrected version of record of the manuscript is available on our site with no access controls, subscription charges or pay-per-view fees (<http://bmjopen.bmj.com>).

If you have any questions on BMJ Open's open peer review process please email [info.bmjopen@bmj.com](mailto:info.bmjopen@bmj.com)

# BMJ Open

## Coronary Atherosclerotic Burden Assessed by SYNTAX Scores and Outcomes in Surgical, Percutaneous, or Medical Strategies: a retrospective cohort study

|                               |                                                                                                                                                                                                                                                                                                                                                                                                                                                                                                                                                                                                                                                                                         |
|-------------------------------|-----------------------------------------------------------------------------------------------------------------------------------------------------------------------------------------------------------------------------------------------------------------------------------------------------------------------------------------------------------------------------------------------------------------------------------------------------------------------------------------------------------------------------------------------------------------------------------------------------------------------------------------------------------------------------------------|
| Journal:                      | <i>BMJ Open</i>                                                                                                                                                                                                                                                                                                                                                                                                                                                                                                                                                                                                                                                                         |
| Manuscript ID                 | bmjopen-2022-062378                                                                                                                                                                                                                                                                                                                                                                                                                                                                                                                                                                                                                                                                     |
| Article Type:                 | Original research                                                                                                                                                                                                                                                                                                                                                                                                                                                                                                                                                                                                                                                                       |
| Date Submitted by the Author: | 02-Mar-2022                                                                                                                                                                                                                                                                                                                                                                                                                                                                                                                                                                                                                                                                             |
| Complete List of Authors:     | Scudeler, Thiago; Universidade de São Paulo Instituto do Coração Farkouh, Michael; Peter Munk Cardiac Centre, Medicine Hueb, Whady; Universidade de São Paulo Instituto do Coração Rezende, Paulo; Universidade de São Paulo Instituto do Coração Campolina, Alessandro; Instituto do Cancer Doutor Arnaldo Vieira de Carvalho, Center for Translational Research in Oncology Martins, Eduardo; Universidade de São Paulo Instituto do Coração Godoy, Lucas; Peter Munk Cardiac Centre Soares, Paulo; Universidade de São Paulo Instituto do Coração Ramires, Jose; Universidade de São Paulo Instituto do Coração Kalil Filho, Roberto; Universidade de São Paulo Instituto do Coração |
| Keywords:                     | Coronary heart disease < CARDIOLOGY, Coronary intervention < CARDIOLOGY, Ischaemic heart disease < CARDIOLOGY                                                                                                                                                                                                                                                                                                                                                                                                                                                                                                                                                                           |
|                               |                                                                                                                                                                                                                                                                                                                                                                                                                                                                                                                                                                                                                                                                                         |

SCHOLARONE™  
Manuscripts

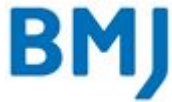

I, the Submitting Author has the right to grant and does grant on behalf of all authors of the Work (as defined in the below author licence), an exclusive licence and/or a non-exclusive licence for contributions from authors who are: i) UK Crown employees; ii) where BMJ has agreed a CC-BY licence shall apply, and/or iii) in accordance with the terms applicable for US Federal Government officers or employees acting as part of their official duties; on a worldwide, perpetual, irrevocable, royalty-free basis to BMJ Publishing Group Ltd ("BMJ") its licensees and where the relevant Journal is co-owned by BMJ to the co-owners of the Journal, to publish the Work in this journal and any other BMJ products and to exploit all rights, as set out in our [licence](#).

The Submitting Author accepts and understands that any supply made under these terms is made by BMJ to the Submitting Author unless you are acting as an employee on behalf of your employer or a postgraduate student of an affiliated institution which is paying any applicable article publishing charge ("APC") for Open Access articles. Where the Submitting Author wishes to make the Work available on an Open Access basis (and intends to pay the relevant APC), the terms of reuse of such Open Access shall be governed by a Creative Commons licence – details of these licences and which [Creative Commons](#) licence will apply to this Work are set out in our licence referred to above.

Other than as permitted in any relevant BMJ Author's Self Archiving Policies, I confirm this Work has not been accepted for publication elsewhere, is not being considered for publication elsewhere and does not duplicate material already published. I confirm all authors consent to publication of this Work and authorise the granting of this licence.

1  
2  
3 **Coronary Atherosclerotic Burden Assessed by SYNTAX Scores and Outcomes in**  
4 **Surgical, Percutaneous, or Medical Strategies: a retrospective cohort study**  
5

6 Thiago L. Scudeler, MD, PhD<sup>a</sup>  
7 Michael E. Farkouh, MD, MSc<sup>b</sup>  
8 Whady Hueb, MD, PhD<sup>a</sup>  
9 Paulo C. Rezende, MD, PhD<sup>a</sup>  
10 Alessandro G. Campolina, MD, PhD<sup>c</sup>  
11 Eduardo B. Martins, MD, PhD<sup>a</sup>  
12 Lucas C. Godoy, MD<sup>a,b</sup>  
13 Paulo R. Soares, MD, PhD<sup>a</sup>  
14 José A. F. Ramires, MD, PhD<sup>a</sup>  
15 Roberto K. Filho, MD, PhD<sup>a</sup>  
16  
17  
18  
19  
20  
21

22 **AUTHOR AFFILIATIONS**

23 <sup>a</sup> Instituto do Coração (InCor), Hospital das Clínicas da Faculdade de Medicina da  
24 Universidade de São Paulo, São Paulo, Brazil.

25 <sup>b</sup> Peter Munk Cardiac Centre, University of Toronto, Toronto, Ontario, Canada; Heart and  
26 Stroke/Richard Lewar Centres of Excellence in Cardiovascular Research, University of  
27 Toronto, Toronto, Ontario, Canada.

28 <sup>c</sup> Instituto do Cancer do Estado de São Paulo, São Paulo, Brazil.  
29  
30  
31

32 **Corresponding author**

33 Dr. Whady Hueb

34 Instituto do Coração (InCor), Hospital das Clínicas da Faculdade de Medicina da  
35 Universidade de São Paulo, São Paulo, Brazil.

36 Ave Dr Eneas de Carvalho Aguiar 44, AB, sala 114, Cerqueira Cesar, 05403-000, São Paulo,  
37 SP, Brazil

38 E-mail: whady.hueb@incor.usp.br

39 Telephone: 55(11)26615032  
40  
41  
42  
43  
44  
45

46 **Running head:** Coronary atherosclerotic burden and treatment strategies  
47  
48  
49  
50  
51  
52  
53  
54  
55  
56  
57  
58  
59  
60

## Abstract

**Objectives** Coronary atherosclerotic burden and SYNTAX score (SS) are predictors of cardiovascular events. This study aimed to investigate the value of SYNTAX scores (SS, SSII and residual SS [rSS]) for predicting cardiovascular events in patients with multivessel coronary artery disease (CAD).

**Design** A retrospective cohort study.

**Setting** A single tertiary cardiology hospital in São Paulo, Brazil.

**Participants** A total of 1,719 patients with stable multivessel CAD and preserved left ventricular ejection fraction (LVEF) were included. Eligible patients were selected between January 2002, and December 2015 from the Medicine, Angioplasty or Surgery Study (MASS) database.

**Intervention** Patients with multivessel CAD who had undergone CABG, PCI, or MT.

**Primary and secondary outcomes** The primary endpoint was death from any cause at 5 years. Secondary outcomes included major adverse cardiac and cerebrovascular events (MACCE), defined as the composite of all-cause death, myocardial infarction, stroke, and subsequent coronary revascularization.

**Results** A total of 1,719 patients, whose mean age was  $60.74 \pm 8.78$  years, underwent PCI (n = 573), CABG (n = 572), or MT (n = 574) alone. The SS was not considered an independent predictor of 5-year death and MACCE in the PCI, CABG and MT cohorts. The SSII (low, intermediate and high SSII, 3.6% vs. 7.9% vs. 10.5%, respectively,  $p < 0.001$ ) was associated with a higher risk of death in the overall population. Within each treatment strategy, SSII was associated with a significant incidence in death at 5 years, especially in CABG patients with intermediate and high SSII ( $p = 0.004$ ) and in MT patients with high SSII ( $p = 0.031$ ). SSII demonstrated a better predictive accuracy for death compared with SS and rSS.

**Conclusions** In patients with multivessel CAD, coronary atherosclerotic burden alone was not associated with significantly increased risk of death and MACCE. The SSII better discriminates the risk for death.

### Strengths and limitations of this study

- This is the only study that concomitantly evaluated the three SYNTAX scores (SS, SSII and rSS) in patients with multivessel CAD undergoing one of three treatment strategies (CABG, PCI or MT).
- The data were collected in a single center, which may limit the external validation of the analysis. Nevertheless, the patients were treated homogeneously by a team of cardiologists experienced in the management of patients with CAD.
- This was a retrospective study, with the intrinsic biases associated with this type of study. However, predictors and outcome variables were collected prospectively.
- Revascularization strategies and standards of practice changed over time. The stent types used in the MASS database were either first- and second-generation DES or BMS. These changes occurred in all study patients, irrespective of the therapeutic group they were placed in at the initiation of the study.
- The sample size of our study is limited leading to issues of the reduced power to detect important differences.

## INTRODUCTION

Historically, the number of diseased vessels as well as the location and extension of the coronary atherosclerotic lesions have been considered predictors of cardiovascular events in the short- and long-term [1] among patients with stable coronary artery disease (CAD). In fact, studies have shown that as the coronary atherosclerosis burden rises, a continued increase in coronary events occurs [2].

The SYNTAX score (SS) was proposed to quantify the complexity and extent of CAD. The score became a surrogate of atherosclerotic burden and a tool to help selecting candidates for percutaneous or surgical treatment [3]. The residual SYNTAX Score (rSS) was derived from the SS to quantify the atherosclerotic burden of residual CAD after percutaneous coronary intervention (PCI) or coronary artery bypass grafting (CABG), and has been validated as an independent predictor of clinical adverse events [4,5]. More recently, the SYNTAX score II (SSII) was developed to increase the prognostic predictive accuracy with the addition of clinical variables [6]. These three scores have not been evaluated concomitantly among patients with coronary artery disease undergoing a coronary revascularization procedure or only medical therapy (MT). The aim of the present study was to assess the prognostic value of coronary atherosclerotic burden through the calculation of the SYNTAX scores (SS, rSS and SSII) in patients with stable multivessel CAD undergoing PCI, CABG, or MT alone.

## METHODS

**STUDY DESIGN.** This is a single-center retrospective study that enrolled patients from the Medicine, Angioplasty or Surgery Study (MASS) unit database at the Heart Institute of the

1  
2  
3 University of Sao Paulo, Brazil. Patients with multivessel CAD (defined as stenosis  $\geq 70\%$  in  
4 at least 2 of the 3 main coronary arteries) and preserved LVEF who underwent coronary  
5 artery bypass grafting (CABG), percutaneous coronary intervention (PCI), or medical  
6 treatment (MT) between January 2002 and December 2015 were included in this study.  
7  
8  
9

10  
11  
12  
13  
14 **DATA COLLECTION AND CRITERIA.** SS and SSII were calculated by scoring all  
15 coronary lesions with a diameter stenosis  $\geq 50\%$ , in vessels with a diameter  $\geq 1.5$  mm, using  
16 the SS algorithm, which is described in full elsewhere [3,7]. Two experienced clinical  
17 cardiologists and two interventional cardiologists blinded to clinical outcomes calculated the  
18 SS retrospectively for each patient. Clinical data were obtained from the medical records for  
19 the calculation of SSII. Intraobserver and interobserver variability for the SS were performed  
20 for 100 coronary angiograms according to the kappa [k] coefficient.  
21  
22  
23  
24  
25  
26  
27  
28  
29

30  
31 For the SS and SSII calculation of the MT group, we used the CABG group as a  
32 reference. This option assumed that surgery is the strategy that provides the most complete  
33 revascularization in patients with multivessel CAD. The residual SYNTAX Score (rSS) was  
34 calculated for each coronary lesion that was evaluated with the SS but was not treated [8].  
35 The coronary angiogram performed immediately after the percutaneous intervention or the  
36 surgical report of the CABG patients was used to calculate the rSS. For the MT group, the  
37 rSS is similar to the SS. A higher value of rSS suggests that more CAD lesions were  
38 untreated. Finally, patients were categorized within each score as low, intermediate, and high  
39 (see **Supplementary material online, Table S1**).  
40  
41  
42  
43  
44  
45  
46  
47  
48  
49  
50  
51  
52  
53  
54  
55  
56  
57  
58  
59  
60



1  
2  
3 **TREATMENT.** Patients were categorized according to three coronary revascularization  
4 strategies: MT, PCI and CABG. Patients in the three groups received intensive secondary  
5 prevention with lifestyle and pharmacologic interventions, using “treat-to-target” algorithms.  
6  
7 All patients were treated according to the current guidelines at the time of study enrollment.  
8  
9

10  
11  
12 Among patients undergoing PCI, target-lesion revascularization was always  
13 attempted, and complete revascularization was performed as clinically appropriate. Subjects  
14 in the PCI group received plain bare metal stents (BMS), or drug eluting stents (DES), as  
15 available. A successful PCI was defined as a normal coronary artery flow or less than 20%  
16 stenosis in the luminal diameter after coronary stent implantation, as assessed by visual  
17 estimation of the angiograms before and after the procedure. Clinical success was defined as  
18 angiographic success plus the absence of in-hospital myocardial infarction (MI), emergency  
19 CABG, or death.  
20  
21  
22  
23  
24  
25  
26  
27  
28  
29

30  
31 CABG was performed in accordance with the best current practices. The use of  
32 cardiac extracorporeal circulation was defined at the discretion of the surgical team, but the  
33 surgical team had experience in both on-pump and off-pump surgery.  
34  
35  
36  
37  
38  
39

40 **STUDY ENDPOINTS.** The primary endpoint was death from any cause at 5 years.  
41  
42 Secondary endpoint was major adverse cardiac and cerebrovascular events (MACCE),  
43 defined as the composite of all-cause death, MI, stroke, and subsequent coronary  
44 revascularization measured.  
45  
46  
47  
48  
49

50  
51 **STATISTICAL ANALYSIS.** Continuous variables were summarized as mean  $\pm$  SD and  
52 compared using the Student unpaired *t* test or the Mann-Whitney test, as appropriate. The  
53 normality assumption for continuous variables was evaluated using the Kolmogorov-Smirnov  
54  
55  
56  
57  
58  
59  
60

1  
2  
3 test. Categorical variables were summarized as counts and percentages and compared with  
4 the chi-square test when appropriate. Otherwise, the Fisher exact test was used. Cox  
5 regression analysis was used to find independent predictors of mortality in the PCI, CABG,  
6 and MT groups. The variables with a probability value of  $<0.20$  in the univariate analyses  
7 were included in the backward stepwise multivariable model. Only variables with statistical  
8 significance ( $p < 0.05$ ) remained in the Cox multivariable model. No correction was made for  
9 multiple tests. Receiver-operating characteristic (ROC) curves were created to evaluate the  
10 capacity of each score to discriminate MACCE in the PCI, CABG, and MT groups. Survival  
11 curves were constructed using Kaplan-Meier estimates and compared by using the log-rank  
12 test at 5 years of follow-up. A 2-sided p-value  $< 0.05$  was considered statistically significant.  
13 All analyses were conducted using the statistical package SPSS 25.0 (IBM®) software for  
14 Windows.

## 33 PATIENT AND PUBLIC INVOLVEMENT

34  
35 Patients and/or the public were not involved in the design, conduct, reporting or  
36 dissemination plans of this research.  
37

## 42 RESULTS

### 47 OVERVIEW OF PATIENT CHARACTERISTICS

48  
49 From January 2002 to December 2015, 2,176 patients with stable multivessel CAD  
50 were screened and 1,719 were included in this study. The reasons for exclusion of the  
51 remaining 457 patients are listed in **Figure S1 in the Supplementary material online**. A  
52 total of 573 patients underwent PCI, 572 underwent CABG, and 574 received MT alone. The  
53  
54  
55  
56  
57  
58  
59  
60

overall clinical, laboratory, and angiographic characteristics of the 3 groups are depicted in **Table 1**. Compared to the PCI and MT patients, those who underwent CABG were more frequently smokers, had more peripheral artery disease (PAD), chronic obstructive pulmonary disease (COPD), presented more frequently with a positive treadmill test, and had more left main coronary artery disease (LMCAD). The SS was significantly higher in the CABG group compared to the MT and PCI groups ( $24.18 \pm 8.20$  vs.  $17.22 \pm 6.55$  vs.  $19.46 \pm 7.56$ , respectively,  $p < 0.001$ ). Conversely, the SSII was significantly higher in the PCI and CABG groups compared to the MT group ( $28.13 \pm 7.97$  vs.  $25.03 \pm 10.52$  vs.  $21.69 \pm 8.53$ , respectively,  $p < 0.001$ ). The rSS was significantly higher in the MT group compared to the PCI and CABG groups ( $19.46 \pm 7.56$  vs.  $8.43 \pm 6.39$  vs.  $4.31 \pm 4.92$ , respectively,  $p < 0.001$ ).

**Table 1** Baseline and Procedure Variables in PCI, CABG, and MT Patient Groups.

|                          | PCI (n = 573)      | CABG (n = 572)     | MT (n = 574)       | p Value |
|--------------------------|--------------------|--------------------|--------------------|---------|
| Age at randomization, yr | $59.78 \pm 8.8$    | $61.75 \pm 8.97$   | $60.69 \pm 8.59$   | 0.222   |
| Male                     | 378 (66.0)         | 397 (69.4)         | 383 (66.7)         | 0.428   |
| Current smoker           | 124 (21.6)         | 163 (28.5)         | 126 (22.0)         | <0.001  |
| Hypertension             | 488 (85.2)         | 469 (82.0)         | 453 (78.9)         | 0.023   |
| Diabetes                 | 292 (51.0)         | 294 (51.4)         | 334 (58.2)         | 0.023   |
| Previous MI              | 269 (46.9)         | 242 (42.3)         | 222 (38.7)         | 0.018   |
| COPD                     | 4 (0.7)            | 26 (4.5)           | 15 (2.6)           | <0.001  |
| PAD                      | 15 (2.6)           | 64 (11.2)          | 19 (3.3)           | <0.001  |
| BMI, kg/m <sup>2</sup>   | $27.74 \pm 4.55$   | $27.70 \pm 4.09$   | $27.92 \pm 4.41$   | 0.547   |
| Total cholesterol, mg/dL | $197.85 \pm 55.16$ | $197.50 \pm 50.92$ | $194.60 \pm 49.28$ | 0.466   |
| LDL cholesterol, mg/dL   | $122.30 \pm 43.30$ | $122.48 \pm 42.35$ | $120.69 \pm 42.64$ | 0.684   |
| HDL cholesterol, mg/dL   | $38.57 \pm 10.25$  | $39.46 \pm 10.66$  | $40.06 \pm 11.40$  | 0.068   |

|                               |                 |                 |                 |        |
|-------------------------------|-----------------|-----------------|-----------------|--------|
| Triglycerides, mg/dL          | 183.71 ± 151.51 | 176.55 ± 109.93 | 172.67 ± 123.99 | 0.175  |
| Glucose, mg/dL                | 131.07 ± 52.70  | 131.08 ± 55.66  | 138.10 ± 61.32  | 0.147  |
| Glycated hemoglobin, %        | 6.81 ± 1.70     | 6.70 ± 1.64     | 7.01 ± 1.81     | 0.004  |
| Creatinine, mg/dL             | 1.04 ± 0.26     | 1.07 ± 0.26     | 1.07 ± 0.40     | 0.107  |
| LVEF, %                       | 61.3 ± 9.3      | 61.1 ± 8.7      | 60.9 ± 9.8      | 0.725  |
| Positive treadmill test       | 391 (68.2)      | 378 (66.1)      | 347 (60.5)      | <0.001 |
| Angina CCS class              |                 |                 |                 |        |
| I                             | 69 (12.0)       | 60 (10.5)       | 124 (21.6)      | <0.001 |
| II                            | 293 (51.2)      | 367 (64.2)      | 314 (54.7)      |        |
| III                           | 193 (33.7)      | 121 (21.2)      | 127 (22.1)      |        |
| IV                            | 18 (3.1)        | 24 (4.2)        | 9 (1.6)         |        |
| Coronary anatomy              |                 |                 |                 |        |
| 2-vessel disease              | 229 (40.0)      | 135 (23.6)      | 155 (27.0)      | <0.001 |
| 3-vessel disease              | 344 (60.0)      | 437 (76.4)      | 419 (73.0)      |        |
| LAD disease                   | 535 (93.4)      | 547 (95.6)      | 557 (97.0)      | 0.012  |
| LMCAD                         | 20 (3.5)        | 158 (27.6)      | 13 (2.3)        | <0.001 |
| SYNTAX score                  | 17.22 ± 6.55    | 24.18 ± 8.20    | 19.46 ± 7.56    | <0.001 |
| SYNTAX score II               | 28.13 ± 7.97    | 25.03 ± 10.52   | 21.69 ± 8.53    | <0.001 |
| Residual SYNTAX score         | 8.43 ± 6.39     | 4.31 ± 4.92     | 19.46 ± 7.56    | <0.001 |
| SRI                           | 54.07 ± 26.20   | 81.85 ± 21.22   | 0               | <0.001 |
| Surgery off-pump              | NA              | 249 (43.7)      | NA              | -      |
| Left internal thoracic artery | NA              | 559 (97.7)      | NA              | -      |
| BMS use                       | 369 (64.4)      | NA              | NA              | -      |
| DES use                       | 204 (35.6)      | NA              | NA              | -      |
| No. of graft vessels          | NA              | 2.9 ± 0.7       | NA              | -      |

1  
2  
3  
4  
5  
6  
7  
8  
9  
10  
11  
12  
13  
14  
15  
16  
17  
18  
19  
20  
21  
22  
23  
24  
25  
26  
27  
28  
29  
30  
31  
32  
33  
34  
35  
36  
37  
38  
39  
40  
41  
42  
43  
44  
45  
46  
47  
48  
49  
50  
51  
52  
53  
54  
55  
56  
57  
58  
59  
60

|                                                                                                                                                                                                                                                                                                                                                                                                                                                                                                                                                        |           |    |    |   |
|--------------------------------------------------------------------------------------------------------------------------------------------------------------------------------------------------------------------------------------------------------------------------------------------------------------------------------------------------------------------------------------------------------------------------------------------------------------------------------------------------------------------------------------------------------|-----------|----|----|---|
| Total number of stents                                                                                                                                                                                                                                                                                                                                                                                                                                                                                                                                 | 2.1 ± 1.0 | NA | NA | - |
| Values are presented as mean ± SD or number (%).                                                                                                                                                                                                                                                                                                                                                                                                                                                                                                       |           |    |    |   |
| Legend: BMI = body mass index; BMS = bare metal stent; CCS = Canadian Cardiovascular Society; COPD = chronic obstructive pulmonary disease; DES = drug eluting stent; HDL = high-density lipoprotein cholesterol; LAD = left anterior descending artery; LDL = low-density lipoprotein cholesterol; LMCAD = left main coronary artery disease; LVEF = left ventricular ejection function; MI = myocardial infarction; PAD = peripheral artery disease; SRI = SYNTAX revascularization index ( $SRI = (1 - [rSS/SS]) \times 100$ ); NA = not available. |           |    |    |   |

The degree of agreement for intraobserver and interobserver reproducibility according to the tertile analysis ( $\leq 22$ , 23 to 32,  $\geq 33$ ) of the SS was substantial ( $k=0.606$ , 95% CI 0.456-0.741,  $p<0.001$ , and  $k=0.656$ , 95% CI 0.498-0.811,  $p<0.001$ , respectively).

Compared to the other revascularization groups, patients in the MT group were more likely to have diabetes and patients of the CABG group, a positive treadmill test. The distribution of SYNTAX score categories according to the treatment strategies is shown in **Table 2**.

**Table 2** Distribution of SYNTAX Scores Categories According to the Treatment Strategy.

| Syntax Score | Subgroups | Treatment |      |      |      |     |      | p Value |
|--------------|-----------|-----------|------|------|------|-----|------|---------|
|              |           | PCI       |      | CABG |      | MT  |      |         |
|              |           | n         | %    | n    | %    | n   | %    |         |
| SS           | <22       | 433       | 75.6 | 230  | 40.2 | 367 | 63.9 | <0.001  |
|              | 22-33     | 133       | 23.2 | 266  | 46.5 | 176 | 30.7 |         |
|              | >33       | 7         | 1.2  | 76   | 13.3 | 31  | 5.4  |         |
| SSII         | <18.7     | 59        | 10.3 | 167  | 29.2 | 219 | 38.2 | <0.001  |
|              | 18.7-25.7 | 197       | 34.4 | 155  | 27.1 | 170 | 29.6 |         |

|                                                                                                                                                                                        |       |     |      |     |      |     |      |        |
|----------------------------------------------------------------------------------------------------------------------------------------------------------------------------------------|-------|-----|------|-----|------|-----|------|--------|
|                                                                                                                                                                                        | >25.7 | 317 | 55.3 | 250 | 43.7 | 185 | 32.2 |        |
|                                                                                                                                                                                        | <4    | 137 | 23.9 | 302 | 52.8 | 0   | 0.0  |        |
| rSS                                                                                                                                                                                    | 4-8   | 189 | 33.0 | 159 | 27.8 | 20  | 3.5  | <0.001 |
|                                                                                                                                                                                        | >8    | 247 | 43.1 | 111 | 19.4 | 554 | 96.5 |        |
| Legend: SS = SYNTAX score; SSII = SYNTAX score II; rSS = residual SYNTAX score; PCI = percutaneous coronary intervention; CABG = coronary artery bypass graft; MT = medical treatment. |       |     |      |     |      |     |      |        |

## MORTALITY IN THE OVERALL COHORT ACCORDING TO THE SYNTAX SCORES

In the overall cohort, there were not statistically significant differences in mortality between low, intermediate and high SS (7.5%, 7.5% and 12.3%, respectively,  $p = 0.148$ , **Figure 1A**) at 5 years. Compared to patients with low SSII, those with intermediate and high SSII (**Figure 1B**) had a higher incidence of death at 5 years (3.6% vs. 7.9% vs. 10.5%, respectively,  $p < 0.001$ ). Higher rSS as well as higher SS also did not significantly increase the mortality rate (low: 7.5%, intermediate: 7.5%, and high: 8.2%,  $p = 0.990$ , **Figure 1C**).

## MORTALITY IN THE PCI, CABG AND MT GROUPS ACCORDING TO DIFFERENT SYNTAX SCORES CATEGORIES

No statistically significant difference for death was observed among patients in the three SS groups within the PCI, CABG, and MT cohorts (**Figure 2A to C**). There was a higher incidence of death in PCI (1.7% with low, 4.6% with intermediate and 8.9% with high SSII,  $p = 0.046$ ) and MT (5.0% with low, 4.7% with intermediate and 10.8% with high SSII,  $p = 0.031$ ) patients with higher SSII values compared to those with lower SSII values. Additionally, the rate of death was lower in CABG patients with low SSII than those with

intermediate and high SSII (1.8%, 9.7% and 10.0%, respectively,  $p = 0.004$ ) (**Figure 2D to F**). The incidence of death was lower in patients of CABG group with low rSS than intermediate and high rSS (5.0%, 10.1% and 10.8%, respectively,  $p = 0.048$ ), with no differences in the PCI and MT cohorts (**Figure 2G to I**).

### LONG-TERM FOLLOW-UP PREDICTORS OF MORTALITY IN PCI, CABG, AND MT GROUPS

In multivariate analysis of the PCI cohort, diabetes (hazard ratio [HR]: 5.50; 95% confidence interval [CI]: 1.23 to 24.54;  $p = 0.025$ ) was independent predictor of mortality at 5 years (**Table 3**).

In the CABG group, after adjustment for potential confounding biases by multivariate logistic Cox regression, intermediate SSII (hazard ratio [HR]: 3.93; 95% confidence interval [CI]: 1.21 to 12.78;  $p = 0.023$ ) and high rSS (hazard ratio [HR]: 3.48; 95% confidence interval [CI]: 1.32 to 9.17;  $p = 0.012$ ) were independent risk factors for mortality at 5 years (**Table 3**).

In the MT group, diabetes (hazard ratio [HR]: 2.14; 95% confidence interval [CI]: 1.04 to 4.38;  $p = 0.037$ ) and high SSII (hazard ratio [HR]: 2.35; 95% confidence interval [CI]: 1.10 to 5.02;  $p = 0.026$ ) were independently associated with mortality at 5 years (**Table 3**).

**Table 3** Multivariable Cox Model for Death in the PCI, CABG, and MT groups.

| Predictor         | HR (95% CI)       | p Value |
|-------------------|-------------------|---------|
| <b>PCI</b>        |                   |         |
| Diabetes Mellitus | 5.50 (1.23-24.54) | 0.025   |

|                                                                                                         |                   |       |
|---------------------------------------------------------------------------------------------------------|-------------------|-------|
| Positive treadmill test                                                                                 | 5.74 (0.75-43.92) | 0.092 |
| <b>CABG</b>                                                                                             |                   |       |
| Intermediate SSII                                                                                       | 3.93 (1.21-12.78) | 0.023 |
| High SSII                                                                                               | 2.79 (0.91-8.57)  | 0.072 |
| Intermediate rSS                                                                                        | 2.50 (0.97-8.57)  | 0.056 |
| High rSS                                                                                                | 3.48 (1.32-9.17)  | 0.012 |
| <b>MT</b>                                                                                               |                   |       |
| Diabetes Mellitus                                                                                       | 2.14 (1.04-4.38)  | 0.037 |
| High SSII                                                                                               | 2.35 (1.10-5.02)  | 0.026 |
| Legend: DM = diabetes mellitus; SS = SYNTAX score; SSII = SYNTAX score II; rSS = residual SYNTAX score. |                   |       |

SSII combining clinical and anatomical variables had better discrimination ability compared with that of SS and rSS to predict death in patients with multivessel CAD (**Figure 3A**). The area under curve (AUC) in the PCI group was 0.486, 0.640 and 0.443 for SS, SSII and rSS, respectively (**Figure 3B**). In the CABG group, the AUC was 0.601, 0.615 and 0.625 for SS, SSII and rSS, respectively (**Figure 3C**). And in the MT group, the AUC was 0.488, 0.625 and 0.488 for SS, SSII and rSS, respectively (**Figure 3D**).

#### **MACCE IN THE PCI, CABG AND MT GROUPS ACCORDING TO SYNTAX SCORES CATEGORIES**

No statistically significant differences in MACCE were observed among patients in the three SS groups within the PCI, CABG, and MT cohorts. No differences were observed in the incidence of MACCE among patients in the three SSII groups within the PCI and MT population. Patients in the lower SSII categories treated with CABG experienced lower incidence of MACCE at 5 years (11.4% vs. 20.0% vs. 20.4% in the low, intermediate and



1  
2  
3 high SSII groups, respectively,  $p = 0.042$ ). The incidence of MACCE was similar among all  
4  
5 rSS categories, regardless of the revascularization strategy. There was a higher incidence of  
6  
7 stroke among patients of the PCI group with high SS (2.4% vs. 3.8% vs. 28.6% with low,  
8  
9 intermediate, and high SS category, respectively,  $p < 0.001$ ). The rates of subsequent  
10  
11 revascularization and myocardial infarction were similar in all SS, SSII and rSS categories of  
12  
13 the PCI, CABG and MT groups (see **Supplementary material online, Table S2**).  
14  
15  
16  
17  
18

## 19 **DISCUSSION**

20  
21 This study evaluated the impact of the coronary atherosclerotic burden on  
22  
23 cardiovascular events through the application of SYNTAX scores in patients with stable  
24  
25 multivessel CAD who underwent CABG, PCI, or MT alone. The main finding of this study is  
26  
27 that atherosclerotic burden alone was not able to discriminate the occurrence of death in these  
28  
29 patients at a follow-up of 5 years regardless of the therapeutic strategy while the SSII  
30  
31 predicted mortality as angiographic and clinical variables were taken into account.  
32  
33  
34

35  
36 Even in the MT group atherosclerotic burden was not associated with increased risk  
37  
38 of death and cardiovascular events. Moreover, most of our patients (70%) had documented  
39  
40 myocardial ischemia and even in this high-risk population the burden of coronary disease was  
41  
42 not associated with a worse cardiovascular prognosis. These findings support the hypothesis  
43  
44 that in patients with stable CAD, a conservative strategy with optimized medical therapy is  
45  
46 associated with good long-term cardiovascular prognosis, particularly in patients with  
47  
48 preserved left ventricular ejection fraction, as shown by the Clinical Outcomes Utilizing  
49  
50 Revascularization and Aggressive Drug Evaluation (COURAGE) trial [9].  
51  
52  
53

54  
55 The maximum expression of the myocardium at risk observed in the MT group did  
56  
57 not reflect a worse prognosis when MT was compared with the CABG or PCI. Our findings  
58  
59  
60

1  
2  
3 are in line with the International Study of Comparative Health Effectiveness with Medical  
4 and Invasive Approaches (ISCHEMIA) trial that did not find differences in cardiovascular  
5 outcomes among patients with documented moderate or severe myocardial ischemia and  
6 stable CAD who underwent invasive or conservative treatment [10]. In concordance with  
7 Garzillo and colleagues, our results showed that regardless of the therapeutic strategy applied,  
8 the presence of documented myocardial ischemia and distinct atherosclerotic burden were not  
9 associated with an increased occurrence of cardiovascular events in patients with multivessel  
10 CAD [11].  
11  
12  
13  
14  
15  
16  
17  
18  
19  
20

21 Recently, a substudy of the ISCHEMIA trial showed a greater association of more  
22 severe CAD with increased risk of death and MI [12]. However, the assessment of  
23 atherosclerotic burden was performed only through the number of compromised vessels, and  
24 not through the anatomical complexity and extent.  
25  
26  
27  
28  
29

30 The addition of clinical variables to the SS has provided a significant improvement in  
31 the process of risk stratification. The SSII had moderate predictive accuracy for death,  
32 clinical characteristics were important predictors of cardiovascular events and death and were  
33 more suitable to predict death in patients with stable CAD. These results found with SSII  
34 suggested that angiographic variables alone did not suffice to accurately stratify the risk of  
35 cardiovascular outcomes in this population. In fact, recent studies have also shown a better  
36 prognostic value of SSII compared to SS for the risk of mortality and MACE [13-16].  
37  
38  
39  
40  
41  
42  
43  
44  
45  
46

47 Of note, the presence of DM was associated with a higher incidence of death in PCI  
48 and MT groups. This finding is in agreement with a recent analysis by Tam et al. that showed  
49 better long-term survival and decreased risk of MACCE in diabetic patients with multivessel  
50 CAD undergoing CABG compared to PCI [17]. Regarding completeness of revascularization,  
51 we found similar incidence of death even with higher tertiles of rSS, except in CABG patients  
52  
53  
54  
55  
56  
57  
58  
59  
60

1  
2  
3 with intermediate and high rSS who presented a higher rate of death. These findings possibly  
4 reflect the stability of CAD, previously confirmed by the The Bypass Angioplasty  
5 Revascularization Investigation 2 Diabetes (BARI 2D) trial [18] and more recently, by the  
6 ISCHEMIA trial [10] and are in agreement with those found by Kobayashi et al. in patients  
7 from the FFR-guided PCI cohort of the Fractional Flow Reserve Versus Angiography for  
8 Multivessel Evaluation (FAME) trial [19].  
9

10  
11  
12 In light of the complexity of coronary disease, and with the results observed in this  
13 study, we can infer that death and MACCE were not directly related to the atherosclerotic  
14 burden. Therefore, it may be that the development of a myocardial infarction and its  
15 consequences depend more on the vulnerability of the plaque, and less on the overall  
16 atherosclerotic burden or myocardial ischemia. These variables must be considered as  
17 aggravating conditions. Myocardial infarction is often associated with the local  
18 characteristics of the atherosclerotic plaque. However, the hypothesis that plaque rupture and  
19 its consequences are more frequent and accentuated in the presence of more extensive  
20 coronary disease is questionable. Symptoms of angina, frequently related to plaque  
21 instability, emerge in this intricate pathophysiological mechanism. The instability of the  
22 plaque, however, cannot be assessed by the SS.  
23  
24  
25  
26  
27  
28  
29  
30  
31  
32  
33  
34  
35  
36  
37  
38  
39  
40  
41

42 Finally, the current analysis indicates that the CAD stability, the strict control of  
43 symptoms of angina with optimized MT, and preserved left ventricular function contributed  
44 to the favorable long-term results. In addition, the atherosclerotic burden alone did not  
45 influence the incidence of death and MACCE. Clinical characteristics are probably more  
46 important for clinical decision-making in patients with multivessel CAD.  
47  
48  
49  
50  
51  
52  
53  
54  
55

## 56 CONCLUSION

57  
58  
59  
60

1  
2  
3 In patients with multivessel CAD and preserved ventricular function, the addition of  
4 clinical variables to anatomical information by means of the SSII significantly impacted the  
5 accuracy of predicting long-term prognosis. The coronary atherosclerotic burden evaluated  
6 by the SS alone was not able to predict mortality and MACCE in patients undergoing PCI,  
7 CABG or MT.  
8  
9  
10  
11  
12  
13  
14  
15  
16

#### 17 **DATA SHARING STATEMENT**

18  
19 The datasets used and/or analysed during the current study are available from the  
20 corresponding author on reasonable request.  
21  
22  
23  
24  
25

#### 26 **ETHICS STATEMENTS**

#### 27 **PATIENT CONSENT FOR PUBLICATION**

28  
29  
30 Not applicable.  
31  
32  
33  
34

#### 35 **ETHICS APPROVAL**

36  
37 This study was approved by our Institutional Review Board and was only initiated  
38 after it (CAAE: 88738618.6.000.0068). Patients agreeing to participate will sign an informed  
39 consent form before entering the study.  
40  
41  
42  
43  
44  
45  
46

#### 47 **ACKNOWLEDGMENTS**

48  
49 We would like to thank all members for hard work in putting together all the forces in  
50 order to performing this study.  
51  
52  
53  
54  
55

#### 56 **CONTRIBUTORS**

1  
2  
3 TLS contributed to data collection, data analysis and writing of the article. WH, MEF,  
4 PCR, and, JAFR, RKF, and LCG contributed to the writing of the article. AGL participated in  
5 analysis of data. EBM helped collect data. All authors revised the manuscript and eventually  
6 approved it for publication. WH was responsible for the overall content as guarantor who  
7 accepted full responsibility for the finished work and the conduct of the study, had access to  
8 the data, and controlled the decision to publish.  
9  
10  
11  
12  
13  
14  
15  
16  
17  
18

## 19 **FUNDING**

20 The present study did not receive any grant research.  
21  
22  
23  
24  
25  
26

## 27 **COMPETING INTERESTS**

28 M. F. has received research grants from Amgen, Novo Nordisk, and Novartis. L.C.G. has  
29 received the Frederick Banting and Charles Best Canada Graduate Scholarship (Doctoral  
30 Research Award) from the Canadian Institutes of Health Research. The other authors have no  
31 relevant conflicts of interest to disclose.  
32  
33  
34  
35  
36  
37  
38  
39  
40  
41  
42  
43  
44  
45  
46  
47  
48  
49  
50  
51  
52  
53  
54  
55  
56  
57  
58  
59  
60

## REFERENCES

1. Klein LW, Weintraub WS, Agarwal JB, et al. Prognostic significance of severe narrowing of the proximal portion of the left anterior descending coronary artery. *Am J Cardiol* 1986;58:42-46. doi: 10.1016/0002-9149(86)90238-9
2. Mark DB, Nelson CL, Califf RM, et al. Continuing evolution of therapy for coronary artery disease. Initial results from the era of coronary angioplasty. *Circulation* 1994;89(5):2015-2025. doi: 10.1161/01.cir.89.5.2015
3. Sianos G, Morel MA, Kappetein AP, et al. The SYNTAX Score: an angiographic tool grading the complexity of coronary artery disease. *EuroIntervention* 2005;1(2):219-227. PMID: 19758907
4. Farooq V, Serruys PW, Bourantas CV, et al. Quantification of incomplete revascularization and its association with five-year mortality in the synergy between percutaneous coronary intervention with taxus and cardiac surgery (SYNTAX) trial validation of the residual SYNTAX score. *Circulation* 2013;128(2):141-151. doi: 10.1161/CIRCULATIONAHA.113.001803
5. Melina G, Angeloni E, Refice S, et al. Residual SYNTAX score following coronary artery bypass grafting. *Eur J Cardiothorac Surg* 2017;51:547-553. doi: 10.1093/ejcts/ezw356
6. Farooq V, van Klaveren D, Steyerberg EW, et al. Anatomical and clinical characteristics to guide decision making between coronary artery bypass surgery and percutaneous coronary intervention for individual patients: development and validation of SYNTAX score II. *Lancet* 2013;381(9867):639-650. doi: 10.1016/S0140-6736(13)60108-7
7. Serruys PW, Onuma Y, Garg S, et al. Assessment of the SYNTAX score in the Syntax study. *EuroIntervention* 2009;5:50-56. doi: 10.4244/eijv5i1a9

- 1  
2  
3 8. Généreux P, Palmerini T, Caixeta A, et al. Quantification and impact of untreated coronary  
4 artery disease after percutaneous coronary intervention: the residual SYNTAX (Synergy  
5 Between PCI with Taxus and Cardiac Surgery) score. *J Am Coll Cardiol* 2012;59:2165-2174.  
6  
7 doi: 10.1016/j.jacc.2012.03.010  
8  
9
- 10 9. Boden WE, O'Rourke RA, Teo KK, et al; COURAGE Trial Research Group. Optimal  
11 medical therapy with or without PCI for stable coronary disease. *N Engl J Med*  
12 2007;356(15):1503-1516. doi: 10.1056/NEJMoa070829  
13  
14
- 15 10. Maron DJ, Hochman JS, Reynolds HR, et al. Initial invasive or conservative strategy for  
16 stable coronary disease. *N Engl J Med* 2020;382(15):1395-1407. doi:  
17 10.1056/NEJMoa1915922  
18  
19
- 20 11. Garzillo CL, Hueb W, Gersh B, et al. Association between stress testing-induced  
21 myocardial ischemia and clinical events in patients with multivessel coronary artery disease.  
22 *JAMA Intern Med* 2019;179(10):1345-1351. doi: 10.1001/jamainternmed.2019.2227  
23  
24
- 25 12. Reynolds HR, Shaw LJ, Min JK, et al. Outcomes in the ISCHEMIA Trial Based on  
26 Coronary Artery Disease and Ischemia Severity. *Circulation* 2021;144(13):1024-1038. doi:  
27 10.1161/CIRCULATIONAHA.120.049755.  
28  
29
- 30 13. Campos CM, van Klaveren D, Farooq V, Simonton CA, Kappetein A-P, Sabik 3<sup>rd</sup> JF, et  
31 al. Long-term forecasting and comparison of mortality in the Evaluation of the Xience  
32 Everolimus Eluting Stent vs. Coronary Artery Bypass Surgery for Effectiveness of Left Main  
33 Revascularization (EXCEL) trial: prospective validation of the SYNTAX Score II. *Eur Heart*  
34 *J* 2015;36:1231-41. doi: 10.1093/eurheartj/ehu518  
35  
36  
37  
38  
39
- 40 14. Campos CM, van Klaveren D, Iqbal J, Onuma Y, Zhang Y-J, Garcia-Garcia HM, et al.  
41 Predictive Performance of SYNTAX Score II in Patients With Left Main and Multivessel  
42  
43  
44  
45  
46  
47  
48  
49  
50  
51  
52  
53  
54  
55  
56  
57  
58  
59  
60

- 1  
2  
3 Coronary Artery Disease-analysis of CREDO-Kyoto registry. *Circ J* 2014;78:1942-9. doi:  
4  
5 10.1253/circj.cj-14-0204  
6  
7  
8 15. Cavalcante R, Sotomi Y, Mancone M, Lee CW, Ahn J-M, Onuma Y, et al. Impact of the  
9  
10 SYNTAX scores I and II in patients with diabetes and multivessel coronary disease: a pooled  
11  
12 analysis of patient level data from the SYNTAX, PRECOMBAT, and BEST trials. *Eur Heart*  
13  
14 *J* 2017;38:1969-77. doi: 10.1093/eurheartj/ehx138  
15  
16  
17 16. Sotomi Y, Cavalcante R, van Klaveren D, Ahn J-M, Lee CW, de Winter RJ, et al.  
18  
19 Individual Long-Term Mortality Prediction Following Either Coronary Stenting or Bypass  
20  
21 Surgery in Patients With Multivessel and/or Unprotected Left Main Disease: An External  
22  
23 Validation of the SYNTAX Score II Model in the 1,480 Patients of the BEST and  
24  
25 PRECOMBAT Randomized Controlled Trials. *JACC Cardiovasc Interv* 2016;9:1564-72. doi:  
26  
27 10.1016/j.jcin.2016.04.023  
28  
29  
30 17. Tam DY, Dharma C, Rocha R, Farkouh ME, et al. Long-Term Survival After Surgical or  
31  
32 Percutaneous Revascularization in Patients With Diabetes and Multivessel Coronary Disease.  
33  
34 *J Am Coll Cardiol* 2020;76:1153-1164. doi: 10.1016/j.jacc.2020.06.052  
35  
36  
37 18. BARI 2D Study Group, Frye RL, August P, Brooks MM, Hardison RM, Kelsey SF,  
38  
39 MacGregor JM, et al. A randomized trial of therapies for type 2 diabetes and coronary artery  
40  
41 disease. *N Engl J Med* 2009;360(24):2503-2515. doi: 10.1056/NEJMoa0805796  
42  
43  
44 19. Kobayashi Y, Nam C-W, Tonino PAL, Kimura T, De Bruyne B, Pijls NHJ, et al. The  
45  
46 Prognostic Value of Residual Coronary Stenoses After Functionally Complete  
47  
48 Revascularization. *J Am Coll Cardiol* 2016;67:1701-11. doi: 10.1016/j.jacc.2016.01.056  
49  
50  
51  
52  
53  
54  
55  
56  
57  
58  
59  
60



## FIGURES

**Figure 1** Kaplan-Meier Survival Curves for All-cause Mortality According to SYNTAX Scores.

Kaplan-Meier curves for mortality stratified by SS (2A), SSII (2B), and rSS (2C) regardless of strategy of treatment (PCI, CABG, or MT).

**Figure 2** Kaplan-Meier Curves for 5-year All-Cause Mortality.

Kaplan-Meier estimates for death in patients assigned to MT, PCI or CABG over 5 years of follow-up according to SYNTAX scores (SS: PCI [A], CABG [B] and MT [C]; SSII: PCI [D], CABG [E] and MT [F]; rSS: PCI [G], CABG [H] and MT [I]).

**Figure 3** ROC Curves SYNTAX Scores for Discrimination of All-Cause Mortality in the PCI, CABG, and MT Groups.

ROC curves SYNTAX scores for Mortality in MASS database (A), PCI group (B), CABG group (C), and MT group (D).

\* In the MT group, SS has the same value as rSS. Therefore, the ROC curves are superimposed (Figure 3D).

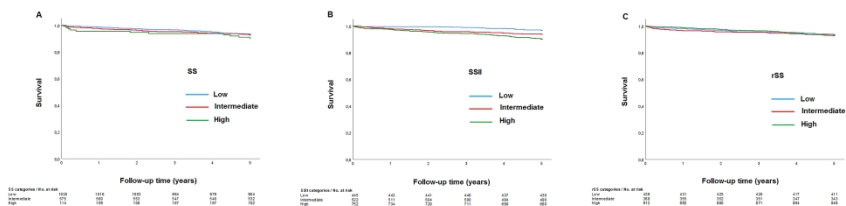

Kaplan-Meier curves for mortality stratified by SS (2A), SSII (2B), and rSS (2C) regardless of strategy of treatment (PCI, CABG, or MT).

758x376mm (300 x 300 DPI)

1  
2  
3  
4  
5  
6  
7  
8  
9  
10  
11  
12  
13  
14  
15  
16  
17  
18  
19  
20  
21  
22  
23  
24  
25  
26  
27  
28  
29  
30  
31  
32  
33  
34  
35  
36  
37  
38  
39  
40  
41  
42  
43  
44  
45  
46  
47  
48  
49  
50  
51  
52  
53  
54  
55  
56  
57  
58  
59  
60

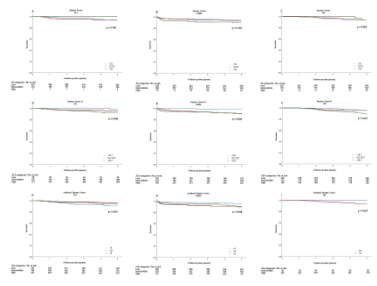

Kaplan-Meier estimates for death in patients assigned to MT, PCI or CABG over 5 years of follow-up according to SYNTAX scores (SS: PCI [A], CABG [B] and MT [C]; SSII: PCI [D], CABG [E] and MT [F]; rSS: PCI [G], CABG [H] and MT [I]).

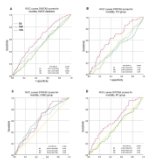

ROC curves SYNTAX scores for Mortality in MASS database (A), PCI group (B), CABG group (C), and MT group (D).

\* In the MT group, SS has the same value as rSS. Therefore, the ROC curves are superimposed (Figure 3D).

**Supplementary Material**

Figure S1. **Enrollment of Patients With Coronary Artery Disease in the MASS Database.**

Table S1. **SYNTAX scores subgroups definition.**

Table S2. **Kaplan-Meier Estimates of Events at 5 Years by SYNTAX Scores Categories and Treatment Arm.**

For peer review only

Figure S1. Enrollment of Patients With Coronary Artery Disease in the MASS Database.

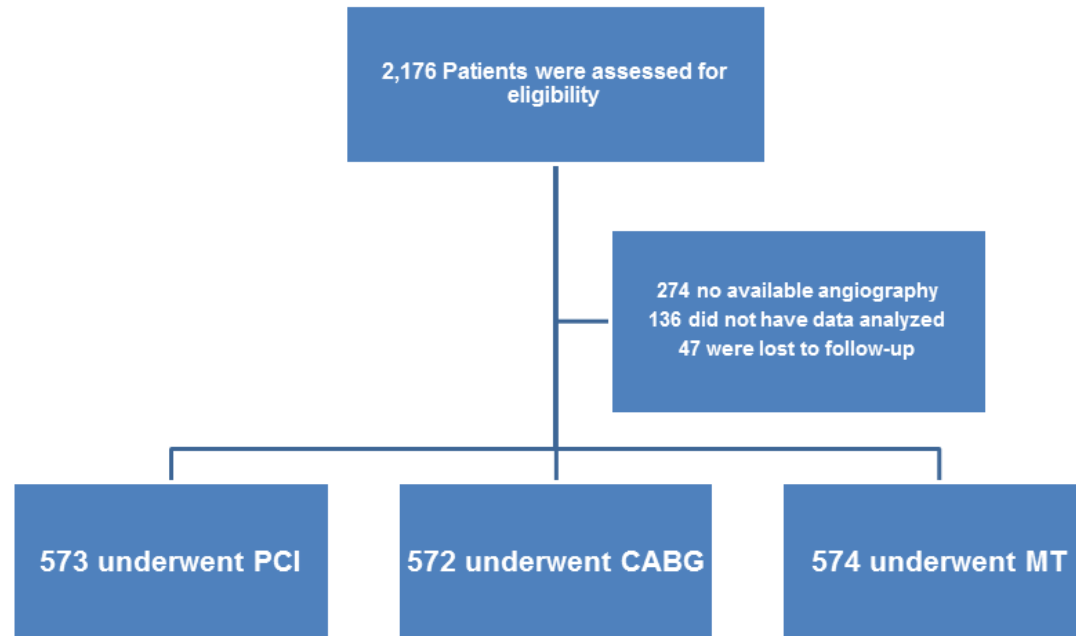

Flowchart for patients included in the MASS database SYNTAX scores analysis. CABG = coronary artery bypass graft; MT = medical treatment; PCI = percutaneous coronary intervention.

Table S1. SYNTAX scores subgroups definition.

| <b>SYNTAX scores</b> | <b>Low</b> | <b>Intermediate</b> | <b>High</b> |
|----------------------|------------|---------------------|-------------|
| SS                   | ≤22        | 23 to 32            | ≥33         |
| SSII                 | <18.7      | 18.7 to 25.7        | >25.7       |
| rSS                  | 0 to 4     | >4 to 8             | >8          |

Legend: SS = SYNTAX score; SSII = SYNTAX score II; rSS = residual SYNTAX score.

For peer review only

Table S2. Kaplan-Meier Estimates of Events at 5 Years by SYNTAX Scores Categories and Treatment Arm.

|                                                                                                             | SS   |              |      |                  |      |              |      |                  |      |              |      |                  |
|-------------------------------------------------------------------------------------------------------------|------|--------------|------|------------------|------|--------------|------|------------------|------|--------------|------|------------------|
|                                                                                                             | PCI  |              |      |                  | CABG |              |      |                  | MT   |              |      |                  |
|                                                                                                             | Low  | Intermediate | High | Log-rank p Value | Low  | Intermediate | High | Log-rank p Value | Low  | Intermediate | High | Log-rank p Value |
| Death                                                                                                       | 6.5  | 6.8          | 4.3  | 0.745            | 5.7  | 8.0          | 12.1 | 0.194            | 6.8  | 6.9          | 6.5  | 0.993            |
| MACCE                                                                                                       | 27.1 | 34.8         | 42.9 | 0.122            | 15.9 | 19.1         | 20.3 | 0.620            | 24.3 | 28.5         | 25.8 | 0.580            |
| Cardiac death                                                                                               | 2.1  | 3.1          | 0    | 0.746            | 1.8  | 2.3          | 0    | 0.429            | 2.5  | 2.9          | 6.4  | 0.463            |
| MI                                                                                                          | 5.7  | 9.4          | 0    | 0.268            | 7.2  | 6.3          | 1.3  | 0.208            | 7.2  | 9.7          | 6.5  | 0.510            |
| Stroke                                                                                                      | 2.4  | 3.8          | 28.6 | <0.001           | 2.7  | 4.7          | 7.4  | 0.257            | 1.9  | 3.5          | 3.2  | 0.550            |
| Further revascularization                                                                                   | 18.6 | 22.6         | 14.3 | 0.549            | 5.5  | 5.6          | 1.5  | 0.353            | 18.0 | 18.2         | 19.8 | 0.981            |
|                                                                                                             | SSII |              |      |                  |      |              |      |                  |      |              |      |                  |
|                                                                                                             | PCI  |              |      |                  | CABG |              |      |                  | MT   |              |      |                  |
|                                                                                                             | Low  | Intermediate | High | Log-rank p Value | Low  | Intermediate | High | Log-rank p Value | Low  | Intermediate | High | Log-rank p Value |
| Death                                                                                                       | 1.7  | 4.6          | 8.9  | 0.046            | 1.8  | 9.8          | 10.2 | 0.004            | 5.0  | 4.7          | 10.8 | 0.031            |
| MACCE                                                                                                       | 18.7 | 28.4         | 31.4 | 0.132            | 11.6 | 20.3         | 20.8 | 0.042            | 23.3 | 24.7         | 29.2 | 0.447            |
| Cardiac death                                                                                               | 0    | 2.0          | 2.9  | 0.381            | 0    | 1.3          | 3.3  | 0.052            | 1.8  | 3.0          | 4.0  | 0.468            |
| MI                                                                                                          | 6.9  | 5.6          | 6.9  | 0.884            | 4.3  | 6.9          | 6.7  | 0.540            | 6.0  | 9.5          | 9.0  | 0.375            |
| Stroke                                                                                                      | 1.7  | 1.6          | 4.3  | 0.185            | 1.8  | 5.6          | 5.2  | 0.200            | 1.4  | 1.8          | 4.5  | 0.114            |
| Further revascularization                                                                                   | 15.4 | 20.3         | 19.6 | 0.687            | 6.2  | 5.5          | 3.8  | 0.601            | 19.1 | 19.9         | 15.2 | 0.468            |
|                                                                                                             | rSS  |              |      |                  |      |              |      |                  |      |              |      |                  |
|                                                                                                             | PCI  |              |      |                  | CABG |              |      |                  | MT   |              |      |                  |
|                                                                                                             | Low  | Intermediate | High | Log-rank p Value | Low  | Intermediate | High | Log-rank p Value | Low  | Intermediate | High | Log-rank p Value |
| Death                                                                                                       | 9.5  | 4.8          | 6.5  | 0.241            | 5.1  | 10.1         | 11.2 | 0.051            | -    | 0            | 7.1  | 0.227            |
| MACCE                                                                                                       | 27.8 | 29.8         | 29.3 | 0.916            | 15.1 | 19.7         | 23.1 | 0.164            | -    | 10.0         | 26.2 | 0.121            |
| Cardiac death                                                                                               | 2.4  | 1.6          | 2.9  | 0.686            | 1.0  | 2.0          | 3.8  | 0.195            | -    | 0            | 2.9  | 0.440            |
| MI                                                                                                          | 8.3  | 7.4          | 5.0  | 0.416            | 6.5  | 4.6          | 6.6  | 0.725            | -    | 5.0          | 8.1  | 0.624            |
| Stroke                                                                                                      | 3.1  | 4.3          | 2.1  | 0.410            | 3.8  | 4.1          | 5.7  | 0.680            | -    | 5.0          | 2.4  | 0.465            |
| Further revascularization                                                                                   | 16.7 | 20.5         | 20.0 | 0.669            | 4.9  | 5.5          | 4.6  | 0.964            | -    | 10.0         | 17.4 | 0.331            |
| Values are presented as %.                                                                                  |      |              |      |                  |      |              |      |                  |      |              |      |                  |
| Legend: MI = myocardial infarction; SS = SYNTAX score; SSII = SYNTAX score II; rSS = residual SYNTAX score. |      |              |      |                  |      |              |      |                  |      |              |      |                  |



# BMJ Open

## Coronary Atherosclerotic Burden Assessed by SYNTAX Scores and Outcomes in Surgical, Percutaneous, or Medical Strategies: a retrospective cohort study

|                                 |                                                                                                                                                                                                                                                                                                                                                                                                                                                                                                                                                                                                                                                                                         |
|---------------------------------|-----------------------------------------------------------------------------------------------------------------------------------------------------------------------------------------------------------------------------------------------------------------------------------------------------------------------------------------------------------------------------------------------------------------------------------------------------------------------------------------------------------------------------------------------------------------------------------------------------------------------------------------------------------------------------------------|
| Journal:                        | <i>BMJ Open</i>                                                                                                                                                                                                                                                                                                                                                                                                                                                                                                                                                                                                                                                                         |
| Manuscript ID                   | bmjopen-2022-062378.R1                                                                                                                                                                                                                                                                                                                                                                                                                                                                                                                                                                                                                                                                  |
| Article Type:                   | Original research                                                                                                                                                                                                                                                                                                                                                                                                                                                                                                                                                                                                                                                                       |
| Date Submitted by the Author:   | 19-May-2022                                                                                                                                                                                                                                                                                                                                                                                                                                                                                                                                                                                                                                                                             |
| Complete List of Authors:       | Scudeler, Thiago; Universidade de São Paulo Instituto do Coração Farkouh, Michael; Peter Munk Cardiac Centre, Medicine Hueb, Whady; Universidade de São Paulo Instituto do Coração Rezende, Paulo; Universidade de São Paulo Instituto do Coração Campolina, Alessandro; Instituto do Cancer Doutor Arnaldo Vieira de Carvalho, Center for Translational Research in Oncology Martins, Eduardo; Universidade de São Paulo Instituto do Coração Godoy, Lucas; Peter Munk Cardiac Centre Soares, Paulo; Universidade de São Paulo Instituto do Coração Ramires, Jose; Universidade de São Paulo Instituto do Coração Kalil Filho, Roberto; Universidade de São Paulo Instituto do Coração |
| <b>Primary Subject Heading</b>: | Cardiovascular medicine                                                                                                                                                                                                                                                                                                                                                                                                                                                                                                                                                                                                                                                                 |
| Secondary Subject Heading:      | Cardiovascular medicine                                                                                                                                                                                                                                                                                                                                                                                                                                                                                                                                                                                                                                                                 |
| Keywords:                       | Coronary heart disease < CARDIOLOGY, Coronary intervention < CARDIOLOGY, Ischaemic heart disease < CARDIOLOGY                                                                                                                                                                                                                                                                                                                                                                                                                                                                                                                                                                           |
|                                 |                                                                                                                                                                                                                                                                                                                                                                                                                                                                                                                                                                                                                                                                                         |

SCHOLARONE™  
Manuscripts

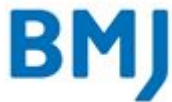

I, the Submitting Author has the right to grant and does grant on behalf of all authors of the Work (as defined in the below author licence), an exclusive licence and/or a non-exclusive licence for contributions from authors who are: i) UK Crown employees; ii) where BMJ has agreed a CC-BY licence shall apply, and/or iii) in accordance with the terms applicable for US Federal Government officers or employees acting as part of their official duties; on a worldwide, perpetual, irrevocable, royalty-free basis to BMJ Publishing Group Ltd ("BMJ") its licensees and where the relevant Journal is co-owned by BMJ to the co-owners of the Journal, to publish the Work in this journal and any other BMJ products and to exploit all rights, as set out in our [licence](#).

The Submitting Author accepts and understands that any supply made under these terms is made by BMJ to the Submitting Author unless you are acting as an employee on behalf of your employer or a postgraduate student of an affiliated institution which is paying any applicable article publishing charge ("APC") for Open Access articles. Where the Submitting Author wishes to make the Work available on an Open Access basis (and intends to pay the relevant APC), the terms of reuse of such Open Access shall be governed by a Creative Commons licence – details of these licences and which [Creative Commons](#) licence will apply to this Work are set out in our licence referred to above.

Other than as permitted in any relevant BMJ Author's Self Archiving Policies, I confirm this Work has not been accepted for publication elsewhere, is not being considered for publication elsewhere and does not duplicate material already published. I confirm all authors consent to publication of this Work and authorise the granting of this licence.

1  
2  
3 **Coronary Atherosclerotic Burden Assessed by SYNTAX Scores and Outcomes in**  
4 **Surgical, Percutaneous, or Medical Strategies: a retrospective cohort study**  
5

6 Thiago L. Scudeler, MD, PhD<sup>a</sup>  
7 Michael E. Farkouh, MD, MSc<sup>b</sup>  
8 Whady Hueb, MD, PhD<sup>a</sup>  
9 Paulo C. Rezende, MD, PhD<sup>a</sup>  
10 Alessandro G. Campolina, MD, PhD<sup>c</sup>  
11 Eduardo B. Martins, MD, PhD<sup>a</sup>  
12 Lucas C. Godoy, MD<sup>a,b</sup>  
13 Paulo R. Soares, MD, PhD<sup>a</sup>  
14 José A. F. Ramires, MD, PhD<sup>a</sup>  
15 Roberto K. Filho, MD, PhD<sup>a</sup>  
16  
17  
18  
19  
20  
21

22 **AUTHOR AFFILIATIONS**

23 <sup>a</sup> Instituto do Coração (InCor), Hospital das Clínicas da Faculdade de Medicina da  
24 Universidade de São Paulo, São Paulo, Brazil.

25 <sup>b</sup> Peter Munk Cardiac Centre, University of Toronto, Toronto, Ontario, Canada; Heart and  
26 Stroke/Richard Lewar Centres of Excellence in Cardiovascular Research, University of  
27 Toronto, Toronto, Ontario, Canada.

28 <sup>c</sup> Instituto do Cancer do Estado de São Paulo, São Paulo, Brazil.  
29  
30  
31

32 **Corresponding author**

33 Dr. Whady Hueb

34 Instituto do Coração (InCor), Hospital das Clínicas da Faculdade de Medicina da Universidade  
35 de São Paulo, São Paulo, Brazil.

36 Ave Dr Eneas de Carvalho Aguiar 44, AB, sala 114, Cerqueira Cesar, 05403-000, São Paulo,  
37 SP, Brazil

38 E-mail: whady.hueb@incor.usp.br

39 Telephone: 55(11)26615032  
40  
41  
42  
43  
44  
45

46 **Running head:** Coronary atherosclerotic burden and treatment strategies  
47  
48  
49  
50  
51  
52  
53  
54  
55  
56  
57  
58  
59  
60

## Abstract

**Introduction** Coronary atherosclerotic burden and SYNTAX score (SS) are predictors of cardiovascular events.

**Objectives** To investigate the value of SYNTAX scores (SS, SSII and residual SS [rSS]) for predicting cardiovascular events in patients with coronary artery disease (CAD).

**Design** Retrospective cohort study.

**Setting** Single tertiary centre.

**Participants** Medicine, Angioplasty or Surgery Study (MASS) database patients with stable multivessel CAD and preserved ejection fraction.

**Interventions** CAD patients undergoing coronary artery bypass graft (CABG), percutaneous coronary intervention (PCI), or medical treatment (MT) alone from January 2002 to December 2015.

**Primary and secondary outcomes** Primary: 5-year all-cause mortality. Secondary: composite of all-cause death, myocardial infarction, stroke, and subsequent coronary revascularization at 5 years.

**Results** A total of 1,719 patients underwent PCI (n = 573), CABG (n = 572), or MT (n = 574) alone. The SS was not considered an independent predictor of 5-year mortality in the PCI (low, intermediate and high SS 6.5%, 6.8% and 4.3%, respectively, p=0.745), CABG (low, intermediate and high SS 5.7%, 8.0% and 12.1%, respectively, p=0.194) and MT (low, intermediate and high SS 6.8%, 6.9% and 6.5%, respectively, p=0.993) cohorts. The SSII (low, intermediate and high SSII, 3.6% vs. 7.9% vs. 10.5%, respectively, p <0.001) was associated with a higher mortality risk in the overall population. Within each treatment strategy, SSII was associated with a significant 5-year mortality rate, especially in CABG patients with higher SSII (low, intermediate and high SSII, 1.8%, 9.7% and 10.0%, respectively, p = 0.004) and in MT patients with high SSII (low, intermediate and high SSII, 5.0%, 4.7% and 10.8%, respectively, p = 0.031). SSII demonstrated a better predictive accuracy for mortality compared with SS and rSS (c-index = 0.62).

**Conclusions** Coronary atherosclerotic burden alone was not associated with significantly increased risk of all-cause mortality. The SSII better discriminates the risk of death.

### Strengths and limitations of this study

- This is the only study that evaluated the three SYNTAX scores (SS, SSII and rSS) in patients with multivessel CAD undergoing one of three treatment strategies (CABG, PCI or MT).
- This analysis focused on the evaluation of atherosclerotic burden through the SYNTAX scores as a predictor of cardiovascular events.
- The addition of clinical variables to SS-II discriminated increased risk of death in this sample.
- The main limitations of this study were the small sample size and the involvement of a single center.

## INTRODUCTION

Historically, the number of diseased vessels as well as the location and extension of the coronary atherosclerotic lesions have been considered predictors of cardiovascular events in the short- and long-term [1] among patients with stable coronary artery disease (CAD). In fact, studies have shown that as the coronary atherosclerosis burden rises, a continued increase in coronary events occurs [2].

The SYNTAX score (SS) was proposed to quantify the complexity and extent of CAD. The score became a surrogate of atherosclerotic burden and a tool to help selecting candidates for percutaneous or surgical treatment [3]. The residual SYNTAX Score (rSS) was derived from the SS to quantify the atherosclerotic burden of residual CAD after percutaneous coronary intervention (PCI) or coronary artery bypass grafting (CABG), and has been validated as an independent predictor of clinical adverse events [4,5]. More recently, the SYNTAX score II (SSII) was developed to increase the prognostic predictive accuracy with the addition of clinical variables [6]. These three scores have not been evaluated concomitantly among patients with coronary artery disease undergoing a coronary revascularization procedure or only medical therapy (MT). The aim of the present study was to assess the prognostic value of coronary atherosclerotic burden through the calculation of the SYNTAX scores (SS, rSS and SSII) in patients with stable multivessel CAD undergoing PCI, CABG, or MT alone.

## METHODS

**STUDY DESIGN.** This is a single-center retrospective study that enrolled patients from the Medicine, Angioplasty or Surgery Study (MASS) unit database at the Heart Institute of the University of Sao Paulo, Brazil. Patients with multivessel CAD (defined as stenosis  $\geq 70\%$  in

1  
2  
3 at least 2 of the 3 main coronary arteries) and preserved LVEF who underwent coronary artery  
4 bypass grafting (CABG), percutaneous coronary intervention (PCI), or medical treatment (MT)  
5  
6 between January 2002 and December 2015 were included in this study see (**Supplementary**  
7  
8 **material online, Table S1**).  
9

10  
11  
12  
13  
14 **DATA COLLECTION AND CRITERIA.** SS and SSII were calculated by scoring all  
15 coronary lesions with a diameter stenosis  $\geq 50\%$ , in vessels with a diameter  $\geq 1.5$  mm, using  
16 the SS algorithm, which is described in full elsewhere [3,7]. Two experienced clinical  
17 cardiologists and two interventional cardiologists blinded to clinical outcomes calculated the  
18 SS retrospectively for each patient. Clinical data were obtained from the medical records for  
19 the calculation of SSII. Intraobserver and interobserver variability for the SS were performed  
20 for 100 coronary angiograms according to the kappa [k] coefficient. Coefficients ranging from  
21 0.21 to 0.40 are considered fair, from 0.41 to 0.60 moderate, from 0.61 to 0.80 substantial, and  
22 over 0.81 excellent. For ordinal variables, the weighted kappa coefficient was used to express  
23 the degree of agreement inter-observer and intra-observer.  
24  
25  
26  
27  
28  
29  
30  
31  
32  
33  
34  
35  
36

37 For the SS and SSII calculation of the MT group, we used the CABG group as a  
38 reference. This option assumed that surgery is the strategy that provides the most complete  
39 revascularization in patients with multivessel CAD. The residual SYNTAX Score (rSS) was  
40 calculated for each coronary lesion that was evaluated with the SS but was not treated [8]. The  
41 coronary angiogram performed immediately after the percutaneous intervention or the surgical  
42 report of the CABG patients was used to calculate the rSS. For the MT group, the rSS is similar  
43 to the SS. A higher value of rSS suggests that more CAD lesions were untreated. Finally,  
44 patients were categorized within each score as low, intermediate, and high (see  
45 **Supplementary material online, Table S2**).  
46  
47  
48  
49  
50  
51  
52  
53  
54  
55  
56  
57  
58  
59  
60

1  
2  
3  
4  
5  
6  
7  
8 **TREATMENT.** Patients were categorized according to three coronary revascularization  
9 strategies: MT, PCI and CABG. Patients in the three groups received intensive secondary  
10 prevention with lifestyle and pharmacologic interventions, using “treat-to-target” algorithms.  
11  
12 All patients were treated according to the current guidelines at the time of study enrollment.  
13  
14

15  
16  
17 Among patients undergoing PCI, target-lesion revascularization was always attempted,  
18 and complete revascularization was performed as clinically appropriate. Subjects in the PCI  
19 group received plain bare metal stents (BMS), or drug eluting stents (DES), as available. A  
20 successful PCI was defined as a normal coronary artery flow or less than 20% stenosis in the  
21 luminal diameter after coronary stent implantation, as assessed by visual estimation of the  
22 angiograms before and after the procedure. Clinical success was defined as angiographic  
23 success plus the absence of in-hospital myocardial infarction (MI), emergency CABG, or death.  
24  
25

26  
27 CABG was performed in accordance with the best current practices. The use of cardiac  
28 extracorporeal circulation was defined at the discretion of the surgical team, but the surgical  
29 team had experience in both on-pump and off-pump surgery.  
30  
31

32  
33  
34 **STUDY ENDPOINTS.** The primary endpoint was death from any cause at 5 years. Secondary  
35 endpoint was major adverse cardiac and cerebrovascular events (MACCE), defined as the  
36 composite of all-cause death, MI, stroke, and subsequent coronary revascularization measured.  
37  
38

39  
40  
41  
42 **STATISTICAL ANALYSIS.** Continuous variables were summarized as mean  $\pm$  SD and  
43 compared using the Student unpaired *t* test or the Mann-Whitney test, as appropriate. The  
44 normality assumption for continuous variables was evaluated using the Kolmogorov-Smirnov  
45  
46  
47  
48  
49  
50



1  
2  
3 test. Categorical variables were summarized as counts and percentages and compared with the  
4  
5 chi-square test when appropriate. Otherwise, the Fisher exact test was used. Cox regression  
6  
7 analysis was used to find independent predictors of mortality in the PCI, CABG, and MT  
8  
9 groups. The variables with a probability value of  $<0.20$  in the univariate analyses were included  
10  
11 in the backward stepwise multivariable model. Only variables with statistical significance ( $p$   
12  
13  $<0.05$ ) remained in the Cox multivariable model. No correction was made for multiple tests.  
14  
15 Receiver-operating characteristic (ROC) curves were created to evaluate the capacity of each  
16  
17 score to discriminate MACCE in the PCI, CABG, and MT groups. Survival curves were  
18  
19 constructed using Kaplan-Meier estimates and compared by using the log-rank test at 5 years  
20  
21 of follow-up. A 2-sided  $p$ -value  $<0.05$  was considered statistically significant. All analyses  
22  
23 were conducted using the statistical package SPSS 25.0 (IBM®) software for Windows.  
24  
25  
26  
27  
28  
29

## 30 31 **PATIENT AND PUBLIC INVOLVEMENT**

32  
33 Patients and/or the public were not involved in the design, conduct, reporting or  
34  
35 dissemination plans of this research.  
36  
37  
38  
39

## 40 41 **RESULTS**

### 42 43 44 **OVERVIEW OF PATIENT CHARACTERISTICS**

45  
46 From January 2002 to December 2015, 2,176 patients with stable multivessel CAD  
47  
48 were screened and 1,719 were included in this study. The reasons for exclusion of the  
49  
50 remaining 457 patients are listed in **Figure S1 in the Supplementary material online**. A total  
51  
52 of 136 patients were lost to follow-up. A total of 573 patients underwent PCI, 572 underwent  
53  
54 CABG, and 574 received MT alone. The overall clinical, laboratory, and angiographic  
55  
56  
57  
58  
59  
60

characteristics of the 3 groups are depicted in **Table 1**. Compared to the PCI and MT patients, those who underwent CABG were more frequently smokers, had more peripheral artery disease (PAD), chronic obstructive pulmonary disease (COPD), presented more frequently with a positive treadmill test, and had more left main coronary artery disease (LMCAD). The SS was significantly higher in the CABG group compared to the MT and PCI groups ( $24.18 \pm 8.20$  vs.  $17.22 \pm 6.55$  vs.  $19.46 \pm 7.56$ , respectively,  $p < 0.001$ ). Conversely, the SSII was significantly higher in the PCI and CABG groups compared to the MT group ( $28.13 \pm 7.97$  vs.  $25.03 \pm 10.52$  vs.  $21.69 \pm 8.53$ , respectively,  $p < 0.001$ ). The rSS was significantly higher in the MT group compared to the PCI and CABG groups ( $19.46 \pm 7.56$  vs.  $8.43 \pm 6.39$  vs.  $4.31 \pm 4.92$ , respectively,  $p < 0.001$ ).

**Table 1** Baseline and Procedure Variables in PCI, CABG, and MT Patient Groups.

|                                 | PCI (n = 573)    | CABG (n = 572)   | MT (n = 574)     | p Value |
|---------------------------------|------------------|------------------|------------------|---------|
| Age at randomization, yr        | $59.78 \pm 8.8$  | $61.75 \pm 8.97$ | $60.69 \pm 8.59$ | 0.222   |
| Male                            | 378 (66.0)       | 397 (69.4)       | 383 (66.7)       | 0.428   |
| Current smoker                  | 124 (21.6)       | 163 (28.5)       | 126 (22.0)       | <0.001  |
| Hypertension                    | 488 (85.2)       | 469 (82.0)       | 453 (78.9)       | 0.023   |
| Diabetes                        | 292 (51.0)       | 294 (51.4)       | 334 (58.2)       | 0.023   |
| Previous MI                     | 269 (46.9)       | 242 (42.3)       | 222 (38.7)       | 0.018   |
| COPD                            | 4 (0.7)          | 26 (4.5)         | 15 (2.6)         | <0.001  |
| PAD                             | 15 (2.6)         | 64 (11.2)        | 19 (3.3)         | <0.001  |
| BMI, kg/m <sup>2</sup>          | $27.74 \pm 4.55$ | $27.70 \pm 4.09$ | $27.92 \pm 4.41$ | 0.547   |
| Systolic blood pressure, mm Hg  | $126.4 \pm 16.1$ | $127.8 \pm 16.0$ | $128.0 \pm 15.4$ | 0.487   |
| Diastolic blood pressure, mm Hg | $72.7 \pm 10.7$  | $73.1 \pm 10.6$  | $74.2 \pm 11.0$  | 0.097   |
| Heart rate, bpm                 | $69.5 \pm 11.3$  | $68.7 \pm 10.7$  | $69.0 \pm 10.8$  | 0.234   |

|                               |                 |                 |                    |        |
|-------------------------------|-----------------|-----------------|--------------------|--------|
| Total cholesterol, mg/dL      | 197.85 ± 55.16  | 197.50 ± 50.92  | 194.60 ± 49.28     | 0.466  |
| LDL cholesterol, mg/dL        | 122.30 ± 43.30  | 122.48 ± 42.35  | 120.69 ± 42.64     | 0.684  |
| HDL cholesterol, mg/dL        | 38.57 ± 10.25   | 39.46 ± 10.66   | 40.06 ± 11.40      | 0.068  |
| Triglycerides, mg/dL          | 183.71 ± 151.51 | 176.55 ± 109.93 | 172.67 ±<br>123.99 | 0.175  |
| Glucose, mg/dL                | 131.07 ± 52.70  | 131.08 ± 55.66  | 138.10 ± 61.32     | 0.147  |
| Glycated hemoglobin, %        | 6.81 ± 1.70     | 6.70 ± 1.64     | 7.01 ± 1.81        | 0.004  |
| Creatinine, mg/dL             | 1.04 ± 0.26     | 1.07 ± 0.26     | 1.07 ± 0.40        | 0.107  |
| LVEF, %                       | 61.3 ± 9.3      | 61.1 ± 8.7      | 60.9 ± 9.8         | 0.725  |
| Positive treadmill test       | 391 (68.2)      | 378 (66.1)      | 347 (60.5)         | <0.001 |
| Angina CCS class              |                 |                 |                    |        |
| I                             | 69 (12.0)       | 60 (10.5)       | 124 (21.6)         | <0.001 |
| II                            | 293 (51.2)      | 367 (64.2)      | 314 (54.7)         |        |
| III                           | 193 (33.7)      | 121 (21.2)      | 127 (22.1)         |        |
| IV                            | 18 (3.1)        | 24 (4.2)        | 9 (1.6)            |        |
| Coronary anatomy              |                 |                 |                    |        |
| 2-vessel disease              | 229 (40.0)      | 135 (23.6)      | 155 (27.0)         | <0.001 |
| 3-vessel disease              | 344 (60.0)      | 437 (76.4)      | 419 (73.0)         |        |
| LAD disease                   | 535 (93.4)      | 547 (95.6)      | 557 (97.0)         | 0.012  |
| LMCAD                         | 20 (3.5)        | 158 (27.6)      | 13 (2.3)           | <0.001 |
| SYNTAX score                  | 17.22 ± 6.55    | 24.18 ± 8.20    | 19.46 ± 7.56       | <0.001 |
| SYNTAX score II               | 28.13 ± 7.97    | 25.03 ± 10.52   | 21.69 ± 8.53       | <0.001 |
| Residual SYNTAX score         | 8.43 ± 6.39     | 4.31 ± 4.92     | 19.46 ± 7.56       | <0.001 |
| Surgery off-pump              | NA              | 249 (43.7)      | NA                 | -      |
| Left internal thoracic artery | NA              | 559 (97.7)      | NA                 | -      |

|                        |            |           |    |   |
|------------------------|------------|-----------|----|---|
| BMS use                | 369 (64.4) | NA        | NA | - |
| DES use                | 204 (35.6) | NA        | NA | - |
| No. of graft vessels   | NA         | 2.9 ± 0.7 | NA | - |
| Total number of stents | 2.1 ± 1.0  | NA        | NA | - |

Values are presented as mean ± SD, median (interquartile range), or number (%).  
 Legend: BMI = body mass index; BMS = bare metal stent; CCS = Canadian Cardiovascular Society; COPD = chronic obstructive pulmonary disease; DES = drug eluting stent; HDL = high-density lipoprotein cholesterol; LAD = left anterior descending artery; LDL = low-density lipoprotein cholesterol; LMCAD = left main coronary artery disease; LVEF = left ventricular ejection function; MI = myocardial infarction; PAD = peripheral artery disease; NA = not available.

The degree of agreement for intraobserver and interobserver reproducibility according to the tertile analysis ( $\leq 22$ , 23 to 32,  $\geq 33$ ) of the SS was substantial ( $k=0.606$ , 95% CI 0.456-0.741,  $p<0.001$ , and  $k=0.656$ , 95% CI 0.498-0.811,  $p<0.001$ , respectively). The intra-observer and inter-observer weighted kappa scores according to SS tertile ( $\leq 22$ , 23 to 32,  $\geq 33$ ) were 0.68 and 0.61, respectively, indicating a substantial agreement.

Compared to the other revascularization groups, patients in the MT group were more likely to have diabetes and patients of the CABG group, a positive treadmill test. The distribution of SYNTAX score categories according to the treatment strategies is shown in **Table 2**.

**Table 2** Distribution of SYNTAX Scores Categories According to the Treatment Strategy.

| Syntax Score | Subgroups | Treatment |      |      |      |     |      | p Value |
|--------------|-----------|-----------|------|------|------|-----|------|---------|
|              |           | PCI       |      | CABG |      | MT  |      |         |
|              |           | n         | %    | n    | %    | n   | %    |         |
|              | <22       | 433       | 75.6 | 230  | 40.2 | 367 | 63.9 |         |

|                                                                                                                                                                                        |           |     |      |     |      |     |      |        |
|----------------------------------------------------------------------------------------------------------------------------------------------------------------------------------------|-----------|-----|------|-----|------|-----|------|--------|
|                                                                                                                                                                                        | 22-33     | 133 | 23.2 | 266 | 46.5 | 176 | 30.7 |        |
| SS                                                                                                                                                                                     | >33       | 7   | 1.2  | 76  | 13.3 | 31  | 5.4  | <0.001 |
|                                                                                                                                                                                        | <18.7     | 59  | 10.3 | 167 | 29.2 | 219 | 38.2 |        |
| SSII                                                                                                                                                                                   | 18.7-25.7 | 197 | 34.4 | 155 | 27.1 | 170 | 29.6 | <0.001 |
|                                                                                                                                                                                        | >25.7     | 317 | 55.3 | 250 | 43.7 | 185 | 32.2 |        |
|                                                                                                                                                                                        | <4        | 137 | 23.9 | 302 | 52.8 | 0   | 0.0  |        |
| rSS                                                                                                                                                                                    | 4-8       | 189 | 33.0 | 159 | 27.8 | 20  | 3.5  | <0.001 |
|                                                                                                                                                                                        | >8        | 247 | 43.1 | 111 | 19.4 | 554 | 96.5 |        |
| Legend: SS = SYNTAX score; SSII = SYNTAX score II; rSS = residual SYNTAX score; PCI = percutaneous coronary intervention; CABG = coronary artery bypass graft; MT = medical treatment. |           |     |      |     |      |     |      |        |

## MORTALITY IN THE OVERALL COHORT ACCORDING TO THE SYNTAX SCORES

In the overall cohort, there were not statistically significant differences in mortality between low, intermediate and high SS (7.5%, 7.5% and 12.3%, respectively,  $p = 0.148$ , **Figure 1A**) at 5 years. Compared to patients with low SSII, those with intermediate and high SSII (**Figure 1B**) had a higher incidence of death at 5 years (3.6% vs. 7.9% vs. 10.5%, respectively,  $p < 0.001$ ). Higher rSS as well as higher SS also did not significantly increase the mortality rate (low: 7.5%, intermediate: 7.5%, and high: 8.2%,  $p = 0.990$ , **Figure 1C**).

## MORTALITY IN THE PCI, CABG AND MT GROUPS ACCORDING TO DIFFERENT SYNTAX SCORES CATEGORIES

1  
2  
3 No statistically significant difference for death was observed among patients in the three  
4 SS groups within the PCI, CABG, and MT cohorts (**Figure 2A to C**). There was a higher  
5 incidence of death in PCI (1.7% with low, 4.6% with intermediate and 8.9% with high SSII,  $p$   
6 = 0.046) and MT (5.0% with low, 4.7% with intermediate and 10.8% with high SSII,  $p$  = 0.031)  
7 patients with higher SSII values compared to those with lower SSII values. Additionally, the  
8 rate of death was lower in CABG patients with low SSII than those with intermediate and high  
9 SSII (1.8%, 9.7% and 10.0%, respectively,  $p$  = 0.004) (**Figure 2D to F**). The incidence of death  
10 was lower in patients of CABG group with low rSS than intermediate and high rSS (5.0%, 10.1%  
11 and 10.8%, respectively,  $p$  = 0.048), with no differences in the PCI and MT cohorts (**Figure**  
12 **2G to I**).

## 28 LONG-TERM FOLLOW-UP PREDICTORS OF MORTALITY IN PCI, CABG, AND 29 MT GROUPS 30 31

32  
33 In multivariate analysis of the PCI cohort, diabetes (hazard ratio [HR]: 5.50; 95%  
34 confidence interval [CI]: 1.23 to 24.54;  $p$  = 0.025) was independent predictor of mortality at 5  
35 years (**Table 3**).

36  
37 In the CABG group, after adjustment for potential confounding biases by multivariate  
38 logistic Cox regression, intermediate SSII (hazard ratio [HR]: 3.93; 95% confidence interval  
39 [CI]: 1.21 to 12.78;  $p$  = 0.023) and high rSS (hazard ratio [HR]: 3.48; 95% confidence interval  
40 [CI]: 1.32 to 9.17;  $p$  = 0.012) were independent risk factors for mortality at 5 years (**Table 3**).

41  
42 In the MT group, diabetes (hazard ratio [HR]: 2.14; 95% confidence interval [CI]: 1.04  
43 to 4.38;  $p$  = 0.037) and high SSII (hazard ratio [HR]: 2.35; 95% confidence interval [CI]: 1.10  
44 to 5.02;  $p$  = 0.026) were independently associated with mortality at 5 years (**Table 3**).

**Table 3** Multivariable Cox Model for Death in the PCI, CABG, and MT groups.

| Predictor                                                                                               | HR (95% CI)       | p Value |
|---------------------------------------------------------------------------------------------------------|-------------------|---------|
| <b>PCI</b>                                                                                              |                   |         |
| Diabetes Mellitus                                                                                       | 5.50 (1.23-24.54) | 0.025   |
| Positive treadmill test                                                                                 | 5.74 (0.75-43.92) | 0.092   |
| <b>CABG</b>                                                                                             |                   |         |
| Intermediate SSII                                                                                       | 3.93 (1.21-12.78) | 0.023   |
| High SSII                                                                                               | 2.79 (0.91-8.57)  | 0.072   |
| Intermediate rSS                                                                                        | 2.50 (0.97-8.57)  | 0.056   |
| High rSS                                                                                                | 3.48 (1.32-9.17)  | 0.012   |
| <b>MT</b>                                                                                               |                   |         |
| Diabetes Mellitus                                                                                       | 2.14 (1.04-4.38)  | 0.037   |
| High SSII                                                                                               | 2.35 (1.10-5.02)  | 0.026   |
| Legend: DM = diabetes mellitus; SS = SYNTAX score; SSII = SYNTAX score II; rSS = residual SYNTAX score. |                   |         |

SSII combining clinical and anatomical variables had better discrimination ability compared with that of SS and rSS to predict death in patients with multivessel CAD (**Figure 3A**). The area under curve (AUC) in the PCI group was 0.486 (CI 95% 0.393-0.579,  $p=0.758$ ), 0.640 (CI 95% 0.559-0.720,  $p=0.002$ ) and 0.443 (CI 95% 0.352-0.534,  $p=0.207$ ) for SS, SSII and rSS, respectively (**Figure 3B**). In the CABG group, the AUC was 0.601 (CI 95% 0.519-0.684,  $p=0.019$ ), 0.615 (CI 95% 0.543-0.687,  $p=0.008$ ) and 0.625 (CI 95% 0.545-0.705,  $p=0.004$ ) for SS, SSII and rSS, respectively (**Figure 3C**). And in the MT group, the AUC was 0.488 (CI 95% 0.398-0.577,  $p=0.046$ ), 0.625 (CI 95% 0.542-0.710,  $p=0.043$ ) and 0.488 (CI 95% 0.398-0.577,  $p=0.046$ ) for SS, SSII and rSS, respectively (**Figure 3D**).

## MACCE IN THE PCI, CABG AND MT GROUPS ACCORDING TO SYNTAX SCORES CATEGORIES

No statistically significant differences in MACCE were observed among patients in the three SS groups within the PCI, CABG, and MT cohorts. No differences were observed in the incidence of MACCE among patients in the three SSII groups within the PCI and MT population. Patients in the lower SSII categories treated with CABG experienced lower incidence of MACCE at 5 years (11.4% vs. 20.0% vs. 20.4% in the low, intermediate and high SSII groups, respectively,  $p = 0.042$ ). The incidence of MACCE was similar among all rSS categories, regardless of the revascularization strategy. There was a higher incidence of stroke among patients of the PCI group with high SS (2.4% vs. 3.8% vs. 28.6% with low, intermediate, and high SS category, respectively,  $p < 0.001$ ). The rates of subsequent revascularization and myocardial infarction were similar in all SS, SSII and rSS categories of the PCI, CABG and MT groups (see **Supplementary material online, Table S3**).

## DISCUSSION

This study evaluated the impact of the coronary atherosclerotic burden on cardiovascular events through the application of SYNTAX scores in patients with stable multivessel CAD who underwent CABG, PCI, or MT alone. The main finding of this study is that atherosclerotic burden alone was not able to discriminate the occurrence of death in these patients at a follow-up of 5 years regardless of the therapeutic strategy while the SSII predicted mortality as angiographic and clinical variables were taken into account.

Even in the MT group atherosclerotic burden was not associated with increased risk of death and cardiovascular events. Moreover, most of our patients (70%) had documented



1  
2  
3 myocardial ischemia and even in this high-risk population the burden of coronary disease was  
4  
5 not associated with a worse cardiovascular prognosis. These findings support the hypothesis  
6  
7 that in patients with stable CAD, a conservative strategy with optimized medical therapy is  
8  
9 associated with good long-term cardiovascular prognosis, particularly in patients with  
10  
11 preserved left ventricular ejection fraction, as shown by the Clinical Outcomes Utilizing  
12  
13 Revascularization and Aggressive Drug Evaluation (COURAGE) trial [9].  
14  
15

16  
17 The maximum expression of the myocardium at risk observed in the MT group did not  
18  
19 reflect a worse prognosis when MT was compared with the CABG or PCI. Our findings are in  
20  
21 line with the International Study of Comparative Health Effectiveness with Medical and  
22  
23 Invasive Approaches (ISCHEMIA) trial that did not find differences in cardiovascular  
24  
25 outcomes among patients with documented moderate or severe myocardial ischemia and stable  
26  
27 CAD who underwent invasive or conservative treatment [10]. In concordance with Garzillo  
28  
29 and colleagues, our results showed that regardless of the therapeutic strategy applied, the  
30  
31 presence of documented myocardial ischemia and distinct atherosclerotic burden were not  
32  
33 associated with an increased occurrence of cardiovascular events in patients with multivessel  
34  
35 CAD [11].  
36  
37  
38  
39

40 Recently, a substudy of the ISCHEMIA trial showed a greater association of more  
41  
42 severe CAD, assessed by coronary computed tomographic angiography, with increased risk of  
43  
44 death and MI [12]. However, the assessment of atherosclerotic burden was performed only  
45  
46 through the number of compromised vessels, and not through the anatomical complexity and  
47  
48 extent.  
49  
50

51 The addition of clinical variables to the SS has provided a significant improvement in  
52  
53 the process of risk stratification. The SSII had moderate predictive accuracy for death, clinical  
54  
55 characteristics were important predictors of cardiovascular events and death and were more  
56  
57  
58  
59  
60

1  
2  
3 suitable to predict death in patients with stable CAD. These results found with SSII suggested  
4 that angiographic variables alone did not suffice to accurately stratify the risk of cardiovascular  
5 outcomes in this population. In fact, recent studies have also shown a better prognostic value  
6 of SSII compared to SS for the risk of mortality and MACE [13-16].  
7  
8  
9

10  
11  
12 Of note, the presence of DM was associated with a higher incidence of death in PCI  
13 and MT groups. This finding is in agreement with a recent analysis by Tam et al. that showed  
14 better long-term survival and decreased risk of MACCE in diabetic patients with multivessel  
15 CAD undergoing CABG compared to PCI [17]. Additionally, a recent study conducted by  
16 Kurtul et al identified a strong correlation between diabetic retinopathy and atherosclerotic  
17 burden measured by the SYNTAX Score [18]. Regarding completeness of revascularization,  
18 we found similar incidence of death even with higher tertiles of rSS, except in CABG patients  
19 with intermediate and high rSS who presented a higher rate of death. These findings possibly  
20 reflect the stability of CAD, previously confirmed by the The Bypass Angioplasty  
21 Revascularization Investigation 2 Diabetes (BARI 2D) trial [19] and more recently, by the  
22 ISCHEMIA trial [10] and are in agreement with those found by Kobayashi et al. in patients  
23 from the FFR-guided PCI cohort of the Fractional Flow Reserve Versus Angiography for  
24 Multivessel Evaluation (FAME) trial [20].  
25  
26  
27  
28  
29  
30  
31  
32  
33  
34  
35  
36  
37  
38  
39  
40  
41

42 In light of the complexity of coronary disease, and with the results observed in this  
43 study, we can infer that death and MACCE were not directly related to the atherosclerotic  
44 burden. Therefore, it may be that the development of a myocardial infarction and its  
45 consequences depend more on the vulnerability of the plaque, and less on the overall  
46 atherosclerotic burden or myocardial ischemia. These variables must be considered as  
47 aggravating conditions. Myocardial infarction is often associated with the local characteristics  
48 of the atherosclerotic plaque. However, the hypothesis that plaque rupture and its consequences  
49  
50  
51  
52  
53  
54  
55  
56  
57  
58  
59  
60

1  
2  
3 are more frequent and accentuated in the presence of more extensive coronary disease is  
4 questionable. Symptoms of angina, frequently related to plaque instability, emerge in this  
5 intricate pathophysiological mechanism. However, the instability of the plaque cannot be  
6 assessed by the SS.  
7  
8  
9  
10  
11

12 Finally, the current analysis indicates that the CAD stability, the strict control of  
13 symptoms of angina with optimized MT, and preserved left ventricular function contributed to  
14 the favorable long-term results. In addition, the atherosclerotic burden alone did not influence  
15 the incidence of death and MACCE. Clinical characteristics are probably more important for  
16 clinical decision-making in patients with multivessel CAD.  
17  
18  
19  
20  
21  
22  
23  
24  
25

## 26 **LIMITATIONS**

27  
28 This study has a few limitations that need to be acknowledged. First, this was a  
29 retrospective study, with the intrinsic biases associated with this type of study. However,  
30 predictors and outcome variables were collected prospectively. Second, revascularization  
31 strategies and standards of practice changed over time. These changes occurred in all study  
32 patients, irrespective of the therapeutic group they were placed in at the initiation of the study.  
33  
34 Third, the sample size of our study is limited, which may compromise statistical power. Last,  
35 the data were collected in a single center, which may limit the generalizability of our results.  
36  
37 Nevertheless, the homogeneity of treatment reduces the limitations of the present study.  
38  
39  
40  
41  
42  
43  
44  
45  
46  
47  
48

## 49 **CONCLUSION**

50  
51 In patients with multivessel CAD and preserved ventricular function, the addition of  
52 clinical variables to anatomical information by means of the SSII significantly impacted the  
53 accuracy of predicting long-term prognosis. The coronary atherosclerotic burden evaluated by  
54  
55  
56  
57  
58  
59  
60

1  
2  
3 the SS alone was not able to predict mortality and MACCE in patients undergoing PCI, CABG  
4  
5 or MT.  
6  
7  
8  
9

#### 10 **DATA SHARING STATEMENT**

11  
12 Extra data can be accessed via the Dryad data repository at <http://datadryad.org/> with the doi:  
13  
14 10.5061/dryad.4f4qrjfv  
15  
16  
17

#### 18 **ETHICS STATEMENTS**

19  
20 The Ethics Committee of the Heart Institute of the University of São Paulo Medical School,  
21  
22 São Paulo, SP, Brazil, approved the trial (CAAE: 88738618.6.000.0068). All procedures were  
23  
24 performed in accordance with the Declaration of Helsinki.  
25  
26  
27  
28  
29  
30  
31  
32  
33  
34

#### 35 **PATIENT CONSENT FOR PUBLICATION**

36  
37 The MASS-Trials database includes randomized clinical trials (MASS-II; MASS-III  
38  
39 and MASS-V) and non-randomized patients (registry). All patients provided written informed  
40  
41 consent and were assigned to a treatment group.  
42  
43  
44  
45  
46

#### 47 **ETHICS APPROVAL**

48  
49 The Ethics Committee of the Heart Institute of the University of São Paulo Medical  
50  
51 School, São Paulo, SP, Brazil, approved the trial. All procedures were performed in accordance  
52  
53 with the Declaration of Helsinki.  
54  
55  
56  
57  
58  
59  
60

## ACKNOWLEDGMENTS

We would like to thank all members for hard work in putting together all the forces in order to performing this study.

## CONTRIBUTORSHIP STATEMENT

TLS contributed to data collection, data analysis and writing of the article. WH, MEF, PCR, and, JAFR, RKF, and LCG contributed to the writing of the article. AGL participated in analysis of data. EBM helped collect data. All authors revised the manuscript and eventually approved it for publication. WH was responsible for the overall content as guarantor who accepted full responsibility for the finished work and the conduct of the study, had access to the data, and controlled the decision to publish.

## FUNDING

The present study did not receive any grant research.

## COMPETING INTERESTS

M. F. has received research grants from Amgen, Novo Nordisk, and Novartis. L.C.G. has received the Frederick Banting and Charles Best Canada Graduate Scholarship (Doctoral Research Award) from the Canadian Institutes of Health Research. The other authors have no relevant conflicts of interest to disclose.

## REFERENCES

- 1 Klein LW, Weintraub WS, Agarwal JB, et al. Prognostic significance of severe narrowing  
2 of the proximal portion of the left anterior descending coronary artery. *Am J Cardiol*  
3 1986;58:42-46. doi: 10.1016/0002-9149(86)90238-9  
4  
5  
6  
7  
8  
9
- 10 2. Mark DB, Nelson CL, Califf RM, et al. Continuing evolution of therapy for coronary artery  
11 disease. Initial results from the era of coronary angioplasty. *Circulation* 1994;89(5):2015-2025.  
12 doi: 10.1161/01.cir.89.5.2015  
13  
14  
15  
16
- 17 3. Sianos G, Morel MA, Kappetein AP, et al. The SYNTAX Score: an angiographic tool  
18 grading the complexity of coronary artery disease. *EuroIntervention* 2005;1(2):219-227. PMID:  
19 19758907  
20  
21  
22  
23
- 24 4. Farooq V, Serruys PW, Bourantas CV, et al. Quantification of incomplete revascularization  
25 and its association with five-year mortality in the synergy between percutaneous coronary  
26 intervention with taxus and cardiac surgery (SYNTAX) trial validation of the residual  
27 SYNTAX score. *Circulation* 2013;128(2):141-151. doi:  
28 10.1161/CIRCULATIONAHA.113.001803  
29  
30  
31  
32  
33  
34
- 35 5. Melina G, Angeloni E, Refice S, et al. Residual SYNTAX score following coronary artery  
36 bypass grafting. *Eur J Cardiothorac Surg* 2017;51:547-553. doi: 10.1093/ejcts/ezw356  
37  
38  
39
- 40 6. Farooq V, van Klaveren D, Steyerberg EW, et al. Anatomical and clinical characteristics to  
41 guide decision making between coronary artery bypass surgery and percutaneous coronary  
42 intervention for individual patients: development and validation of SYNTAX score II. *Lancet*  
43 2013;381(9867):639-650. doi: 10.1016/S0140-6736(13)60108-7  
44  
45  
46  
47  
48
- 49 7. Serruys PW, Onuma Y, Garg S, et al. Assessment of the SYNTAX score in the Syntax study.  
50 *EuroIntervention* 2009;5:50-56. doi: 10.4244/eijv5i1a9  
51  
52  
53
- 54 8. Généreux P, Palmerini T, Caixeta A, et al. Quantification and impact of untreated coronary  
55 artery disease after percutaneous coronary intervention: the residual SYNTAX (Synergy  
56  
57  
58  
59  
60

1  
2  
3 Between PCI with Taxus and Cardiac Surgery) score. *J Am Coll Cardiol* 2012;59:2165-2174.

4  
5 doi: 10.1016/j.jacc.2012.03.010

6  
7  
8 9. Boden WE, O'Rourke RA, Teo KK, et al; COURAGE Trial Research Group. Optimal  
9  
10 medical therapy with or without PCI for stable coronary disease. *N Engl J Med*  
11  
12 2007;356(15):1503-1516. doi: 10.1056/NEJMoa070829

13  
14  
15 10. Maron DJ, Hochman JS, Reynolds HR, et al. Initial invasive or conservative strategy for  
16  
17 stable coronary disease. *N Engl J Med* 2020;382(15):1395-1407. doi:  
18  
19 10.1056/NEJMoa1915922

20  
21  
22 11. Garzillo CL, Hueb W, Gersh B, et al. Association between stress testing-induced  
23  
24 myocardial ischemia and clinical events in patients with multivessel coronary artery disease.  
25  
26 *JAMA Intern Med* 2019;179(10):1345-1351. doi: 10.1001/jamainternmed.2019.2227

27  
28  
29 12. Reynolds HR, Shaw LJ, Min JK, et al. Outcomes in the ISCHEMIA Trial Based on  
30  
31 Coronary Artery Disease and Ischemia Severity. *Circulation* 2021;144(13):1024-1038. doi:  
32  
33 10.1161/CIRCULATIONAHA.120.049755.

34  
35  
36 13. Campos CM, van Klaveren D, Farooq V, Simonton CA, Kappetein A-P, Sabik 3<sup>rd</sup> JF, et al.  
37  
38 Long-term forecasting and comparison of mortality in the Evaluation of the Xience Everolimus  
39  
40 Eluting Stent vs. Coronary Artery Bypass Surgery for Effectiveness of Left Main  
41  
42 Revascularization (EXCEL) trial: prospective validation of the SYNTAX Score II. *Eur Heart*  
43  
44 *J* 2015;36:1231-41. doi: 10.1093/eurheartj/ehu518

45  
46  
47 14. Campos CM, van Klaveren D, Iqbal J, Onuma Y, Zhang Y-J, Garcia-Garcia HM, et al.  
48  
49 Predictive Performance of SYNTAX Score II in Patients With Left Main and Multivessel  
50  
51 Coronary Artery Disease-analysis of CREDO-Kyoto registry. *Circ J* 2014;78:1942-9. doi:  
52  
53 10.1253/circj.cj-14-0204

- 1  
2  
3 15. Cavalcante R, Sotomi Y, Mancone M, Lee CW, Ahn J-M, Onuma Y, et al. Impact of the  
4 SYNTAX scores I and II in patients with diabetes and multivessel coronary disease: a pooled  
5  
6 analysis of patient level data from the SYNTAX, PRECOMBAT, and BEST trials. *Eur Heart*  
7  
8 *J* 2017;38:1969-77. doi: 10.1093/eurheartj/ehx138  
9  
10  
11  
12 16. Sotomi Y, Cavalcante R, van Klaveren D, Ahn J-M, Lee CW, de Winter RJ, et al. Individual  
13  
14 Long-Term Mortality Prediction Following Either Coronary Stenting or Bypass Surgery in  
15  
16 Patients With Multivessel and/or Unprotected Left Main Disease: An External Validation of  
17  
18 the SYNTAX Score II Model in the 1,480 Patients of the BEST and PRECOMBAT  
19  
20 Randomized Controlled Trials. *JACC Cardiovasc Interv* 2016;9:1564-72. doi:  
21  
22 10.1016/j.jcin.2016.04.023  
23  
24  
25 17. Tam DY, Dharma C, Rocha R, Farkouh ME, et al. Long-Term Survival After Surgical or  
26  
27 Percutaneous Revascularization in Patients With Diabetes and Multivessel Coronary Disease.  
28  
29 *J Am Coll Cardiol* 2020;76:1153-1164. doi: 10.1016/j.jacc.2020.06.052  
30  
31  
32 18. Kurtul BE, Kurtul A, Yalçın F. Predictive value of the SYNTAX score for diabetic  
33  
34 retinopathy in stable coronary artery disease patients with a concomitant type 2 diabetes  
35  
36 mellitus. *Diabetes Res Clin Pract* 2021;177:108875. doi: 10.1016/j.diabres.2021.108875.  
37  
38  
39 19. BARI 2D Study Group, Frye RL, August P, Brooks MM, Hardison RM, Kelsey SF,  
40  
41 MacGregor JM, et al. A randomized trial of therapies for type 2 diabetes and coronary artery  
42  
43 disease. *N Engl J Med* 2009;360(24):2503-2515. doi: 10.1056/NEJMoa0805796  
44  
45  
46 20. Kobayashi Y, Nam C-W, Tonino PAL, Kimura T, De Bruyne B, Pijls NHJ, et al. The  
47  
48 Prognostic Value of Residual Coronary Stenoses After Functionally Complete  
49  
50 Revascularization. *J Am Coll Cardiol* 2016;67:1701-11. doi: 10.1016/j.jacc.2016.01.056  
51  
52  
53

## 54 FIGURES

55  
56  
57  
58  
59  
60



1  
2  
3 **Figure 1** Kaplan-Meier Survival Curves for All-cause Mortality According to SYNTAX  
4 Scores.  
5  
6  
7  
8  
9

10 Kaplan-Meier curves for mortality stratified by SS (2A), SSII (2B), and rSS (2C) regardless of strategy of treatment (PCI, CABG, or MT).

11  
12  
13  
14 **Figure 2** Kaplan-Meier Curves for 5-year All-Cause Mortality.  
15  
16  
17

18 Kaplan-Meier estimates for death in patients assigned to MT, PCI or CABG over 5 years of follow-up according to SYNTAX scores (SS: PCI  
19 [A], CABG [B] and MT [C]; SSII: PCI [D], CABG [E] and MT [F]; rSS: PCI [G], CABG [H] and MT [I]).  
20  
21  
22

23  
24 **Figure 3** ROC Curves SYNTAX Scores for Discrimination of All-Cause Mortality in the PCI,  
25 CABG, and MT Groups.  
26  
27  
28

29 ROC curves SYNTAX scores for Mortality in MASS database (A), PCI group (B), CABG group (C), and MT group (D).

30 \* In the MT group, SS has the same value as rSS. Therefore, the ROC curves are superimposed (Figure 3D).  
31  
32  
33  
34  
35  
36  
37  
38  
39  
40  
41  
42  
43  
44  
45  
46  
47  
48  
49  
50  
51  
52  
53  
54  
55  
56  
57  
58  
59  
60

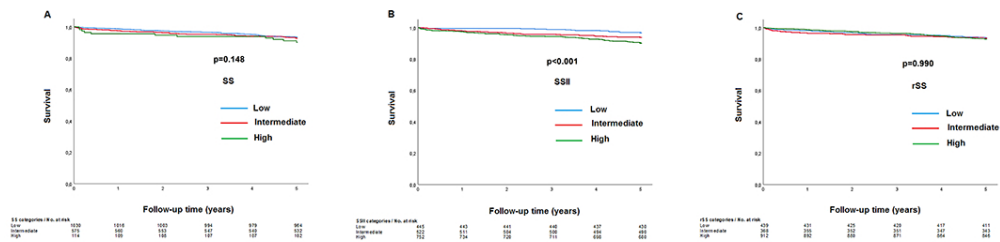

Kaplan-Meier curves for mortality stratified by SS (2A), SSII (2B), and rSS (2C) regardless of strategy of treatment (PCI, CABG, or MT).

228x77mm (118 x 118 DPI)

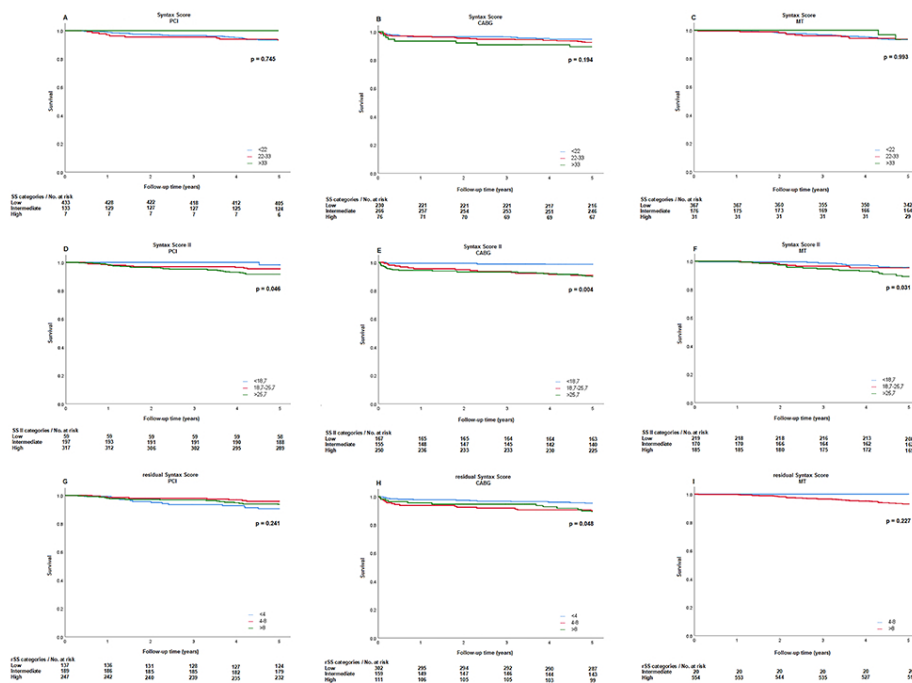

Kaplan-Meier estimates for death in patients assigned to MT, PCI or CABG over 5 years of follow-up according to SYNTAX scores (SS: PCI [A], CABG [B] and MT [C]; SSII: PCI [D], CABG [E] and MT [F]; rSS: PCI [G], CABG [H] and MT [I]).

228x164mm (118 x 118 DPI)

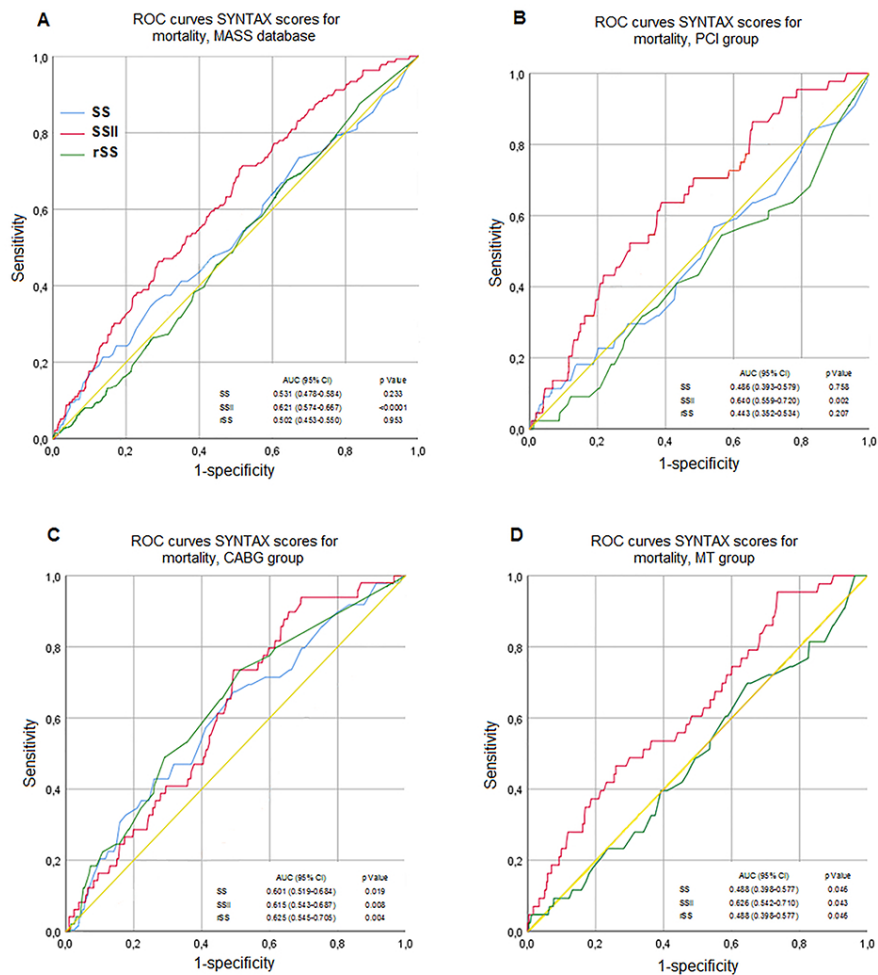

ROC curves SYNTAX scores for Mortality in MASS database (A), PCI group (B), CABG group (C), and MT group (D). \* In the MT group, SS has the same value as rSS. Therefore, the ROC curves are superimposed (Figure 3D).

228x228mm (118 x 118 DPI)

## Supplementary Material

1  
2  
3 Figure S1. **Enrollment of Patients With Coronary Artery Disease in the MASS Database.**

4  
5  
6 Table S1. **Inclusion and Exclusion Criteria.**

7  
8  
9 Table S2. **SYNTAX scores subgroups definition.**

10  
11  
12 Table S3. **Kaplan-Meier Estimates of Events at 5 Years by SYNTAX Scores Categories and Treatment Arm.**

13  
14  
15  
16  
17  
18  
19  
20  
21  
22  
23  
24  
25  
26  
27  
28  
29  
30  
31  
32  
33  
34  
35  
36  
37  
38  
39  
40  
41  
42  
43  
44  
45  
46

For peer review only

Figure S1. Enrollment of Patients With Coronary Artery Disease in the MASS Database.

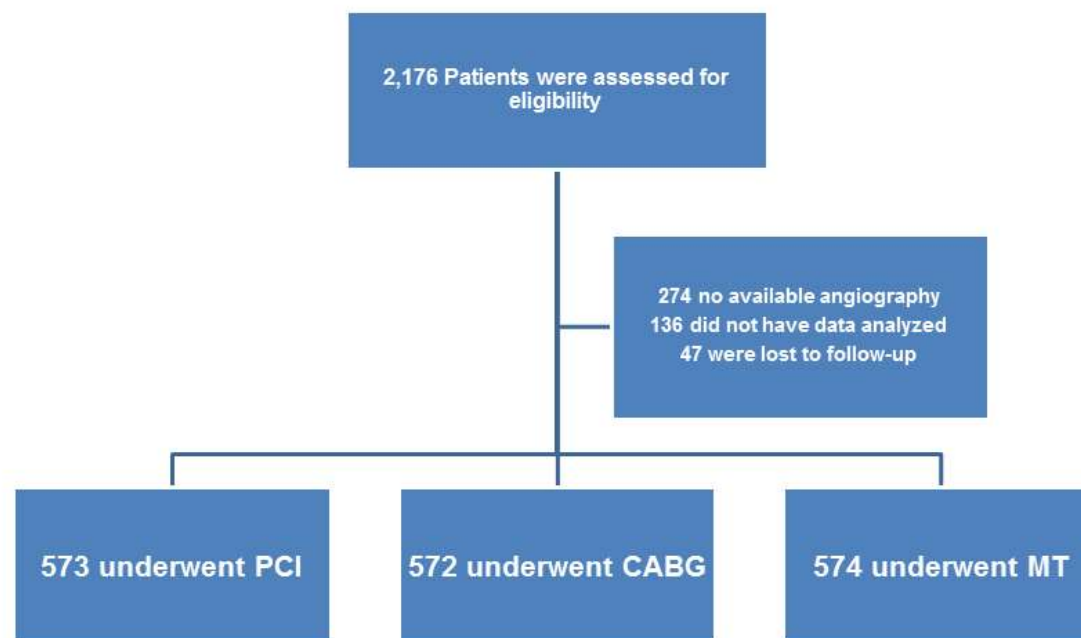

Flowchart for patients included in the MASS database SYNTAX scores analysis. CABG = coronary artery bypass graft; MT = medical treatment; PCI = percutaneous coronary intervention.

Table S1. Inclusion and exclusion criteria.

|                                                                                                   |
|---------------------------------------------------------------------------------------------------|
| <b>Inclusion criteria</b>                                                                         |
| • Multivessel CAD (defined as stenosis $\geq 70\%$ in at least 2 of the 3 main coronary arteries) |
| • Preserved LVEF                                                                                  |
| • Stable CAD                                                                                      |
| <b>Exclusion criteria</b>                                                                         |
| • Refractory angina or acute MI requiring emergency revascularization                             |
| • Ventricular aneurysm requiring surgical repair                                                  |
| • Left ventricular ejection fraction of $<40\%$                                                   |
| • Previous PCI or CABG                                                                            |
| • Single-vessel CAD                                                                               |
| • History of congenital heart disease, valvular heart disease, or cardiomyopathy                  |
| • Patients unable to understand or cooperate with the protocol requirements                       |
| • Left main coronary artery stenosis of $\geq 50\%$                                               |
| • Suspected or known pregnancy                                                                    |
| • Another coexisting condition that was a contraindication to CABG or PCI.                        |

Table S2. SYNTAX scores subgroups definition.

| <b>SYNTAX scores</b> | <b>Low</b> | <b>Intermediate</b> | <b>High</b> |
|----------------------|------------|---------------------|-------------|
| SS                   | ≤22        | 23 to 32            | ≥33         |
| SSII                 | <18.7      | 18.7 to 25.7        | >25.7       |
| rSS                  | 0 to 4     | >4 to 8             | >8          |

Legend: SS = SYNTAX score; SSII = SYNTAX score II; rSS = residual SYNTAX score.

For peer review only



Table S3. Kaplan-Meier Estimates of Events at 5 Years by SYNTAX Scores Categories and Treatment Arm.

|                                                                                                             | SS   |              |      |                  |      |              |      |                  |      |              |      |                  |
|-------------------------------------------------------------------------------------------------------------|------|--------------|------|------------------|------|--------------|------|------------------|------|--------------|------|------------------|
|                                                                                                             | PCI  |              |      |                  | CABG |              |      |                  | MT   |              |      |                  |
|                                                                                                             | Low  | Intermediate | High | Log-rank p Value | Low  | Intermediate | High | Log-rank p Value | Low  | Intermediate | High | Log-rank p Value |
| Death                                                                                                       | 6.5  | 6.8          | 4.3  | 0.745            | 5.7  | 8.0          | 12.1 | 0.194            | 6.8  | 6.9          | 6.5  | 0.993            |
| MACCE                                                                                                       | 27.1 | 34.8         | 42.9 | 0.122            | 15.9 | 19.1         | 20.3 | 0.620            | 24.3 | 28.5         | 25.8 | 0.580            |
| Cardiac death                                                                                               | 2.1  | 3.1          | 0    | 0.746            | 1.8  | 2.3          | 0    | 0.429            | 2.5  | 2.9          | 6.4  | 0.463            |
| MI                                                                                                          | 5.7  | 9.4          | 0    | 0.268            | 7.2  | 6.3          | 1.3  | 0.208            | 7.2  | 9.7          | 6.5  | 0.510            |
| Stroke                                                                                                      | 2.4  | 3.8          | 28.6 | <0.001           | 2.7  | 4.7          | 7.4  | 0.257            | 1.9  | 3.5          | 3.2  | 0.550            |
| Further revascularization                                                                                   | 18.6 | 22.6         | 14.3 | 0.549            | 5.5  | 5.6          | 1.5  | 0.353            | 18.0 | 18.2         | 19.8 | 0.981            |
|                                                                                                             | SSII |              |      |                  |      |              |      |                  |      |              |      |                  |
|                                                                                                             | PCI  |              |      |                  | CABG |              |      |                  | MT   |              |      |                  |
|                                                                                                             | Low  | Intermediate | High | Log-rank p Value | Low  | Intermediate | High | Log-rank p Value | Low  | Intermediate | High | Log-rank p Value |
| Death                                                                                                       | 1.7  | 4.6          | 8.9  | 0.046            | 1.8  | 9.8          | 10.2 | 0.004            | 5.0  | 4.7          | 10.8 | 0.031            |
| MACCE                                                                                                       | 18.7 | 28.4         | 31.4 | 0.132            | 11.6 | 20.3         | 20.8 | 0.042            | 23.3 | 24.7         | 29.2 | 0.447            |
| Cardiac death                                                                                               | 0    | 2.0          | 2.9  | 0.381            | 0    | 1.3          | 3.3  | 0.052            | 1.8  | 3.0          | 4.0  | 0.468            |
| MI                                                                                                          | 6.9  | 5.6          | 6.9  | 0.884            | 4.3  | 6.9          | 6.7  | 0.540            | 6.0  | 9.5          | 9.0  | 0.375            |
| Stroke                                                                                                      | 1.7  | 1.6          | 4.3  | 0.185            | 1.8  | 5.6          | 5.2  | 0.200            | 1.4  | 1.8          | 4.5  | 0.114            |
| Further revascularization                                                                                   | 15.4 | 20.3         | 19.6 | 0.687            | 6.2  | 5.5          | 3.8  | 0.601            | 19.1 | 19.9         | 15.2 | 0.468            |
|                                                                                                             | rSS  |              |      |                  |      |              |      |                  |      |              |      |                  |
|                                                                                                             | PCI  |              |      |                  | CABG |              |      |                  | MT   |              |      |                  |
|                                                                                                             | Low  | Intermediate | High | Log-rank p Value | Low  | Intermediate | High | Log-rank p Value | Low  | Intermediate | High | Log-rank p Value |
| Death                                                                                                       | 9.5  | 4.8          | 6.5  | 0.241            | 5.1  | 10.1         | 11.2 | 0.051            | -    | 0            | 7.1  | 0.227            |
| MACCE                                                                                                       | 27.8 | 29.8         | 29.3 | 0.916            | 15.1 | 19.7         | 23.1 | 0.164            | -    | 10.0         | 26.2 | 0.121            |
| Cardiac death                                                                                               | 2.4  | 1.6          | 2.9  | 0.686            | 1.0  | 2.0          | 3.8  | 0.195            | -    | 0            | 2.9  | 0.440            |
| MI                                                                                                          | 8.3  | 7.4          | 5.0  | 0.416            | 6.5  | 4.6          | 6.6  | 0.725            | -    | 5.0          | 8.1  | 0.624            |
| Stroke                                                                                                      | 3.1  | 4.3          | 2.1  | 0.410            | 3.8  | 4.1          | 5.7  | 0.680            | -    | 5.0          | 2.4  | 0.465            |
| Further revascularization                                                                                   | 16.7 | 20.5         | 20.0 | 0.669            | 4.9  | 5.5          | 4.6  | 0.964            | -    | 10.0         | 17.4 | 0.331            |
| Values are presented as %.                                                                                  |      |              |      |                  |      |              |      |                  |      |              |      |                  |
| Legend: MI = myocardial infarction; SS = SYNTAX score; SSII = SYNTAX score II; rSS = residual SYNTAX score. |      |              |      |                  |      |              |      |                  |      |              |      |                  |

1  
2  
3  
4  
5  
6  
7  
8  
9  
10  
11  
12  
13  
14  
15  
16  
17  
18  
19  
20  
21  
22  
23  
24  
25  
26  
27  
28  
29  
30  
31  
32  
33  
34  
35  
36  
37  
38  
39  
40  
41  
42  
43  
44  
45  
46  
47  
48  
49  
50  
51  
52  
53  
54  
55  
56  
57  
58  
59  
60

## STROBE Statement—checklist of items that should be included in reports of observational studies

|                              | <b>Item No</b> | <b>Recommendation</b>                                                                                                                                                                                                                                                                                                            |
|------------------------------|----------------|----------------------------------------------------------------------------------------------------------------------------------------------------------------------------------------------------------------------------------------------------------------------------------------------------------------------------------|
| <b>Title and abstract</b>    | 1              | (a) Indicate the study's design with a commonly used term in the title or the abstract<br>Retrospective cohort study in title and abstract<br>(b) Provide in the abstract an informative and balanced summary of what was done and what was found<br>See abstract                                                                |
| <b>Introduction</b>          |                |                                                                                                                                                                                                                                                                                                                                  |
| Background/rationale         | 2              | Explain the scientific background and rationale for the investigation being reported<br>Page 4                                                                                                                                                                                                                                   |
| Objectives                   | 3              | State specific objectives, including any prespecified hypotheses<br>Page 4                                                                                                                                                                                                                                                       |
| <b>Methods</b>               |                |                                                                                                                                                                                                                                                                                                                                  |
| Study design                 | 4              | Present key elements of study design early in the paper<br>Pages 4 and 5                                                                                                                                                                                                                                                         |
| Setting                      | 5              | Describe the setting, locations, and relevant dates, including periods of recruitment, exposure, follow-up, and data collection<br>Page 5                                                                                                                                                                                        |
| Participants                 | 6              | (a) <i>Cohort study</i> —Give the eligibility criteria, and the sources and methods of selection of participants. Describe methods of follow-up<br>Page 5<br>(b) <i>Cohort study</i> —For matched studies, give matching criteria and number of exposed and unexposed<br>N/A                                                     |
| Variables                    | 7              | Clearly define all outcomes, exposures, predictors, potential confounders, and effect modifiers. Give diagnostic criteria, if applicable<br>Pages 5 and 6                                                                                                                                                                        |
| Data sources/<br>measurement | 8*             | For each variable of interest, give sources of data and details of methods of assessment (measurement). Describe comparability of assessment methods if there is more than one group<br>Pages 5 and 6                                                                                                                            |
| Bias                         | 9              | Describe any efforts to address potential sources of bias<br>Page 6                                                                                                                                                                                                                                                              |
| Study size                   | 10             | Explain how the study size was arrived at<br>All available patients were included                                                                                                                                                                                                                                                |
| Quantitative variables       | 11             | Explain how quantitative variables were handled in the analyses. If applicable, describe which groupings were chosen and why<br>Pages 6 and 7 (Method of handling variables was reported. The criteria for selecting groups were detailed).                                                                                      |
| Statistical methods          | 12             | (a) Describe all statistical methods, including those used to control for confounding<br>Page 7<br>(b) Describe any methods used to examine subgroups and interactions<br>Page 7<br>(c) Explain how missing data were addressed<br>Page 8<br>(d) <i>Cohort study</i> —If applicable, explain how loss to follow-up was addressed |

1  
2  
3  
4  
5  
6  
7  
8  
9  
10  
11  
12  
13  
14  
15  
16  
17  
18  
19  
20  
21  
22  
23  
24  
25  
26  
27  
28  
29  
30  
31  
32  
33  
34  
35  
36  
37  
38  
39  
40  
41  
42  
43  
44  
45  
46  
47  
48  
49  
50  
51  
52  
53  
54  
55  
56  
57  
58  
59  
60

---

Page 8

*Case-control study*—If applicable, explain how matching of cases and controls was addressed

*Cross-sectional study*—If applicable, describe analytical methods taking account of sampling strategy

---

(e) Describe any sensitivity analyses

Pages 7, 12, 13, Figure 3

---

Continued on next page

1  
2  
3  
4  
5  
6  
7  
8  
9  
10  
11  
12  
13  
14  
15  
16  
17  
18  
19  
20  
21  
22  
23  
24  
25  
26  
27  
28  
29  
30  
31  
32  
33  
34  
35  
36  
37  
38  
39  
40  
41  
42  
43  
44  
45  
46  
47  
48  
49  
50  
51  
52  
53  
54  
55  
56  
57  
58  
59  
60

## Results

|                  |     |                                                                                                                                                                                                                                                                                                                                                                                                                                       |
|------------------|-----|---------------------------------------------------------------------------------------------------------------------------------------------------------------------------------------------------------------------------------------------------------------------------------------------------------------------------------------------------------------------------------------------------------------------------------------|
| Participants     | 13* | (a) Report numbers of individuals at each stage of study—eg numbers potentially eligible, examined for eligibility, confirmed eligible, included in the study, completing follow-up, and analysed<br>Page 8<br>(b) Give reasons for non-participation at each stage<br>Page 8<br>(c) Consider use of a flow diagram<br>Figure S1 in the Supplement                                                                                    |
| Descriptive data | 14* | (a) Give characteristics of study participants (eg demographic, clinical, social) and information on exposures and potential confounders<br>page 8, Table 1<br>(b) Indicate number of participants with missing data for each variable of interest<br>Table 1<br>(c) <i>Cohort study</i> —Summarise follow-up time (eg, average and total amount)<br>Page 8                                                                           |
| Outcome data     | 15* | <i>Cohort study</i> —Report numbers of outcome events or summary measures over time<br>Pages 11 and 12. Figures 1 and 2<br><i>Case-control study</i> —Report numbers in each exposure category, or summary measures of exposure<br><i>Cross-sectional study</i> —Report numbers of outcome events or summary measures                                                                                                                 |
| Main results     | 16  | (a) Give unadjusted estimates and, if applicable, confounder-adjusted estimates and their precision (eg, 95% confidence interval). Make clear which confounders were adjusted for and why they were included<br>Pages 11-13, Table 3<br>(b) Report category boundaries when continuous variables were categorized<br>(c) If relevant, consider translating estimates of relative risk into absolute risk for a meaningful time period |
| Other analyses   | 17  | Report other analyses done—eg analyses of subgroups and interactions, and sensitivity analyses                                                                                                                                                                                                                                                                                                                                        |

## Discussion

|                  |    |                                                                                                                                                                                          |
|------------------|----|------------------------------------------------------------------------------------------------------------------------------------------------------------------------------------------|
| Key results      | 18 | Summarise key results with reference to study objectives<br>Page 14                                                                                                                      |
| Limitations      | 19 | Discuss limitations of the study, taking into account sources of potential bias or imprecision. Discuss both direction and magnitude of any potential bias<br>Pages 16 and 17            |
| Interpretation   | 20 | Give a cautious overall interpretation of results considering objectives, limitations, multiplicity of analyses, results from similar studies, and other relevant evidence<br>Page 14-17 |
| Generalisability | 21 | Discuss the generalisability (external validity) of the study results<br>Pages 16 and 17                                                                                                 |

## Other information

|         |    |                                                                                                                                                                                            |
|---------|----|--------------------------------------------------------------------------------------------------------------------------------------------------------------------------------------------|
| Funding | 22 | Give the source of funding and the role of the funders for the present study and, if applicable, for the original study on which the present article is based<br>The study was not funded. |
|---------|----|--------------------------------------------------------------------------------------------------------------------------------------------------------------------------------------------|

1  
2 \*Give information separately for cases and controls in case-control studies and, if applicable, for exposed and  
3 unexposed groups in cohort and cross-sectional studies.  
4

5  
6 **Note:** An Explanation and Elaboration article discusses each checklist item and gives methodological background and  
7 published examples of transparent reporting. The STROBE checklist is best used in conjunction with this article (freely  
8 available on the Web sites of PLoS Medicine at <http://www.plosmedicine.org/>, Annals of Internal Medicine at  
9 <http://www.annals.org/>, and Epidemiology at <http://www.epidem.com/>). Information on the STROBE Initiative is  
10 available at [www.strobe-statement.org](http://www.strobe-statement.org).  
11  
12  
13  
14  
15  
16  
17  
18  
19  
20  
21  
22  
23  
24  
25  
26  
27  
28  
29  
30  
31  
32  
33  
34  
35  
36  
37  
38  
39  
40  
41  
42  
43  
44  
45  
46  
47  
48  
49  
50  
51  
52  
53  
54  
55  
56  
57  
58  
59  
60
