# Supplementary material for: Coronary atherosclerotic burden assessed by SYNTAX scores and outcomes in surgical, percutaneous or medical strategies: a retrospective cohort study
Source: PubMed Central journal article supplement — BMJ Open. 2022 Sep 22;12(9):e062378. doi: 10.1136/bmjopen-2022-062378 (PMC9511539; doi:10.1136/bmjopen-2022-062378), 2022-09-22
Supplement: bmjopen-2022-062378supp001.pdf [file bmjopen-2022-062378supp001.pdf]

## Supplementary Material

Figure S1. **Enrollment of Patients With Coronary Artery Disease in the MASS Database.**

Table S1. **Inclusion and Exclusion Criteria.**

Table S2. **SYNTAX scores subgroups definition.**

Table S3. **Kaplan-Meier Estimates of Events at 5 Years by SYNTAX Scores Categories and Treatment Arm.**

Figure S1. Enrollment of Patients With Coronary Artery Disease in the MASS Database.

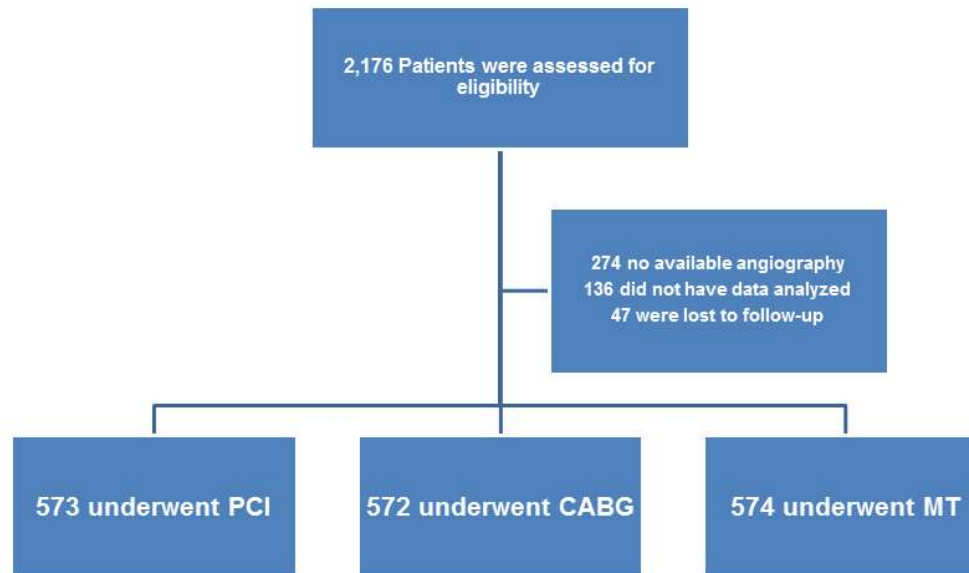

Flowchart for patients included in the MASS database SYNTAX scores analysis. CABG = coronary artery bypass graft; MT = medical treatment; PCI = percutaneous coronary intervention.

Table S1. Inclusion and exclusion criteria.

|                                                                                                  |
|--------------------------------------------------------------------------------------------------|
| <b>Inclusion criteria</b>                                                                        |
| • Multivessel CAD (defined as stenosis $\geq$ 70% in at least 2 of the 3 main coronary arteries) |
| • Preserved LVEF                                                                                 |
| • Stable CAD                                                                                     |
| <b>Exclusion criteria</b>                                                                        |
| • Refractory angina or acute MI requiring emergency revascularization                            |
| • Ventricular aneurysm requiring surgical repair                                                 |
| • Left ventricular ejection fraction of $<$ 40%                                                  |
| • Previous PCI or CABG                                                                           |
| • Single-vessel CAD                                                                              |
| • History of congenital heart disease, valvular heart disease, or cardiomyopathy                 |
| • Patients unable to understand or cooperate with the protocol requirements                      |
| • Left main coronary artery stenosis of $\geq$ 50%                                               |
| • Suspected or known pregnancy                                                                   |
| • Another coexisting condition that was a contraindication to CABG or PCI.                       |

Table S2. **SYNTAX scores subgroups definition.**

| <b>SYNTAX scores</b> | <b>Low</b> | <b>Intermediate</b> | <b>High</b> |
|----------------------|------------|---------------------|-------------|
| SS                   | ≤22        | 23 to 32            | ≥33         |
| SSII                 | <18.7      | 18.7 to 25.7        | >25.7       |
| rSS                  | 0 to 4     | >4 to 8             | >8          |

Legend: SS = SYNTAX score; SSII = SYNTAX score II; rSS = residual SYNTAX score.

Table S3. Kaplan-Meier Estimates of Events at 5 Years by SYNTAX Scores Categories and Treatment Arm.

|                                                                                                             | SS   |              |      |                  |      |              |      |                  |      |              |      |                  |
|-------------------------------------------------------------------------------------------------------------|------|--------------|------|------------------|------|--------------|------|------------------|------|--------------|------|------------------|
|                                                                                                             | PCI  |              |      |                  | CABG |              |      |                  | MT   |              |      |                  |
|                                                                                                             | Low  | Intermediate | High | Log-rank p Value | Low  | Intermediate | High | Log-rank p Value | Low  | Intermediate | High | Log-rank p Value |
| Death                                                                                                       | 6.5  | 6.8          | 4.3  | 0.745            | 5.7  | 8.0          | 12.1 | 0.194            | 6.8  | 6.9          | 6.5  | 0.993            |
| MACCE                                                                                                       | 27.1 | 34.8         | 42.9 | 0.122            | 15.9 | 19.1         | 20.3 | 0.620            | 24.3 | 28.5         | 25.8 | 0.580            |
| Cardiac death                                                                                               | 2.1  | 3.1          | 0    | 0.746            | 1.8  | 2.3          | 0    | 0.429            | 2.5  | 2.9          | 6.4  | 0.463            |
| MI                                                                                                          | 5.7  | 9.4          | 0    | 0.268            | 7.2  | 6.3          | 1.3  | 0.208            | 7.2  | 9.7          | 6.5  | 0.510            |
| Stroke                                                                                                      | 2.4  | 3.8          | 28.6 | <0.001           | 2.7  | 4.7          | 7.4  | 0.257            | 1.9  | 3.5          | 3.2  | 0.550            |
| Further revascularization                                                                                   | 18.6 | 22.6         | 14.3 | 0.549            | 5.5  | 5.6          | 1.5  | 0.353            | 18.0 | 18.2         | 19.8 | 0.981            |
|                                                                                                             | SSII |              |      |                  |      |              |      |                  |      |              |      |                  |
|                                                                                                             | PCI  |              |      |                  | CABG |              |      |                  | MT   |              |      |                  |
|                                                                                                             | Low  | Intermediate | High | Log-rank p Value | Low  | Intermediate | High | Log-rank p Value | Low  | Intermediate | High | Log-rank p Value |
| Death                                                                                                       | 1.7  | 4.6          | 8.9  | 0.046            | 1.8  | 9.8          | 10.2 | 0.004            | 5.0  | 4.7          | 10.8 | 0.031            |
| MACCE                                                                                                       | 18.7 | 28.4         | 31.4 | 0.132            | 11.6 | 20.3         | 20.8 | 0.042            | 23.3 | 24.7         | 29.2 | 0.447            |
| Cardiac death                                                                                               | 0    | 2.0          | 2.9  | 0.381            | 0    | 1.3          | 3.3  | 0.052            | 1.8  | 3.0          | 4.0  | 0.468            |
| MI                                                                                                          | 6.9  | 5.6          | 6.9  | 0.884            | 4.3  | 6.9          | 6.7  | 0.540            | 6.0  | 9.5          | 9.0  | 0.375            |
| Stroke                                                                                                      | 1.7  | 1.6          | 4.3  | 0.185            | 1.8  | 5.6          | 5.2  | 0.200            | 1.4  | 1.8          | 4.5  | 0.114            |
| Further revascularization                                                                                   | 15.4 | 20.3         | 19.6 | 0.687            | 6.2  | 5.5          | 3.8  | 0.601            | 19.1 | 19.9         | 15.2 | 0.468            |
|                                                                                                             | rSS  |              |      |                  |      |              |      |                  |      |              |      |                  |
|                                                                                                             | PCI  |              |      |                  | CABG |              |      |                  | MT   |              |      |                  |
|                                                                                                             | Low  | Intermediate | High | Log-rank p Value | Low  | Intermediate | High | Log-rank p Value | Low  | Intermediate | High | Log-rank p Value |
| Death                                                                                                       | 9.5  | 4.8          | 6.5  | 0.241            | 5.1  | 10.1         | 11.2 | 0.051            | -    | 0            | 7.1  | 0.227            |
| MACCE                                                                                                       | 27.8 | 29.8         | 29.3 | 0.916            | 15.1 | 19.7         | 23.1 | 0.164            | -    | 10.0         | 26.2 | 0.121            |
| Cardiac death                                                                                               | 2.4  | 1.6          | 2.9  | 0.686            | 1.0  | 2.0          | 3.8  | 0.195            | -    | 0            | 2.9  | 0.440            |
| MI                                                                                                          | 8.3  | 7.4          | 5.0  | 0.416            | 6.5  | 4.6          | 6.6  | 0.725            | -    | 5.0          | 8.1  | 0.624            |
| Stroke                                                                                                      | 3.1  | 4.3          | 2.1  | 0.410            | 3.8  | 4.1          | 5.7  | 0.680            | -    | 5.0          | 2.4  | 0.465            |
| Further revascularization                                                                                   | 16.7 | 20.5         | 20.0 | 0.669            | 4.9  | 5.5          | 4.6  | 0.964            | -    | 10.0         | 17.4 | 0.331            |
| Values are presented as %.                                                                                  |      |              |      |                  |      |              |      |                  |      |              |      |                  |
| Legend: MI = myocardial infarction; SS = SYNTAX score; SSII = SYNTAX score II; rSS = residual SYNTAX score. |      |              |      |                  |      |              |      |                  |      |              |      |                  |
